# Supplementary figures and images for: Striking parallels between dorsoventral patterning in Drosophila and Gryllus reveal a complex evolutionary history behind a model gene regulatory network
Source: eLife journal article supplement (doi:10.7554/elife.68287), 2021-03-30

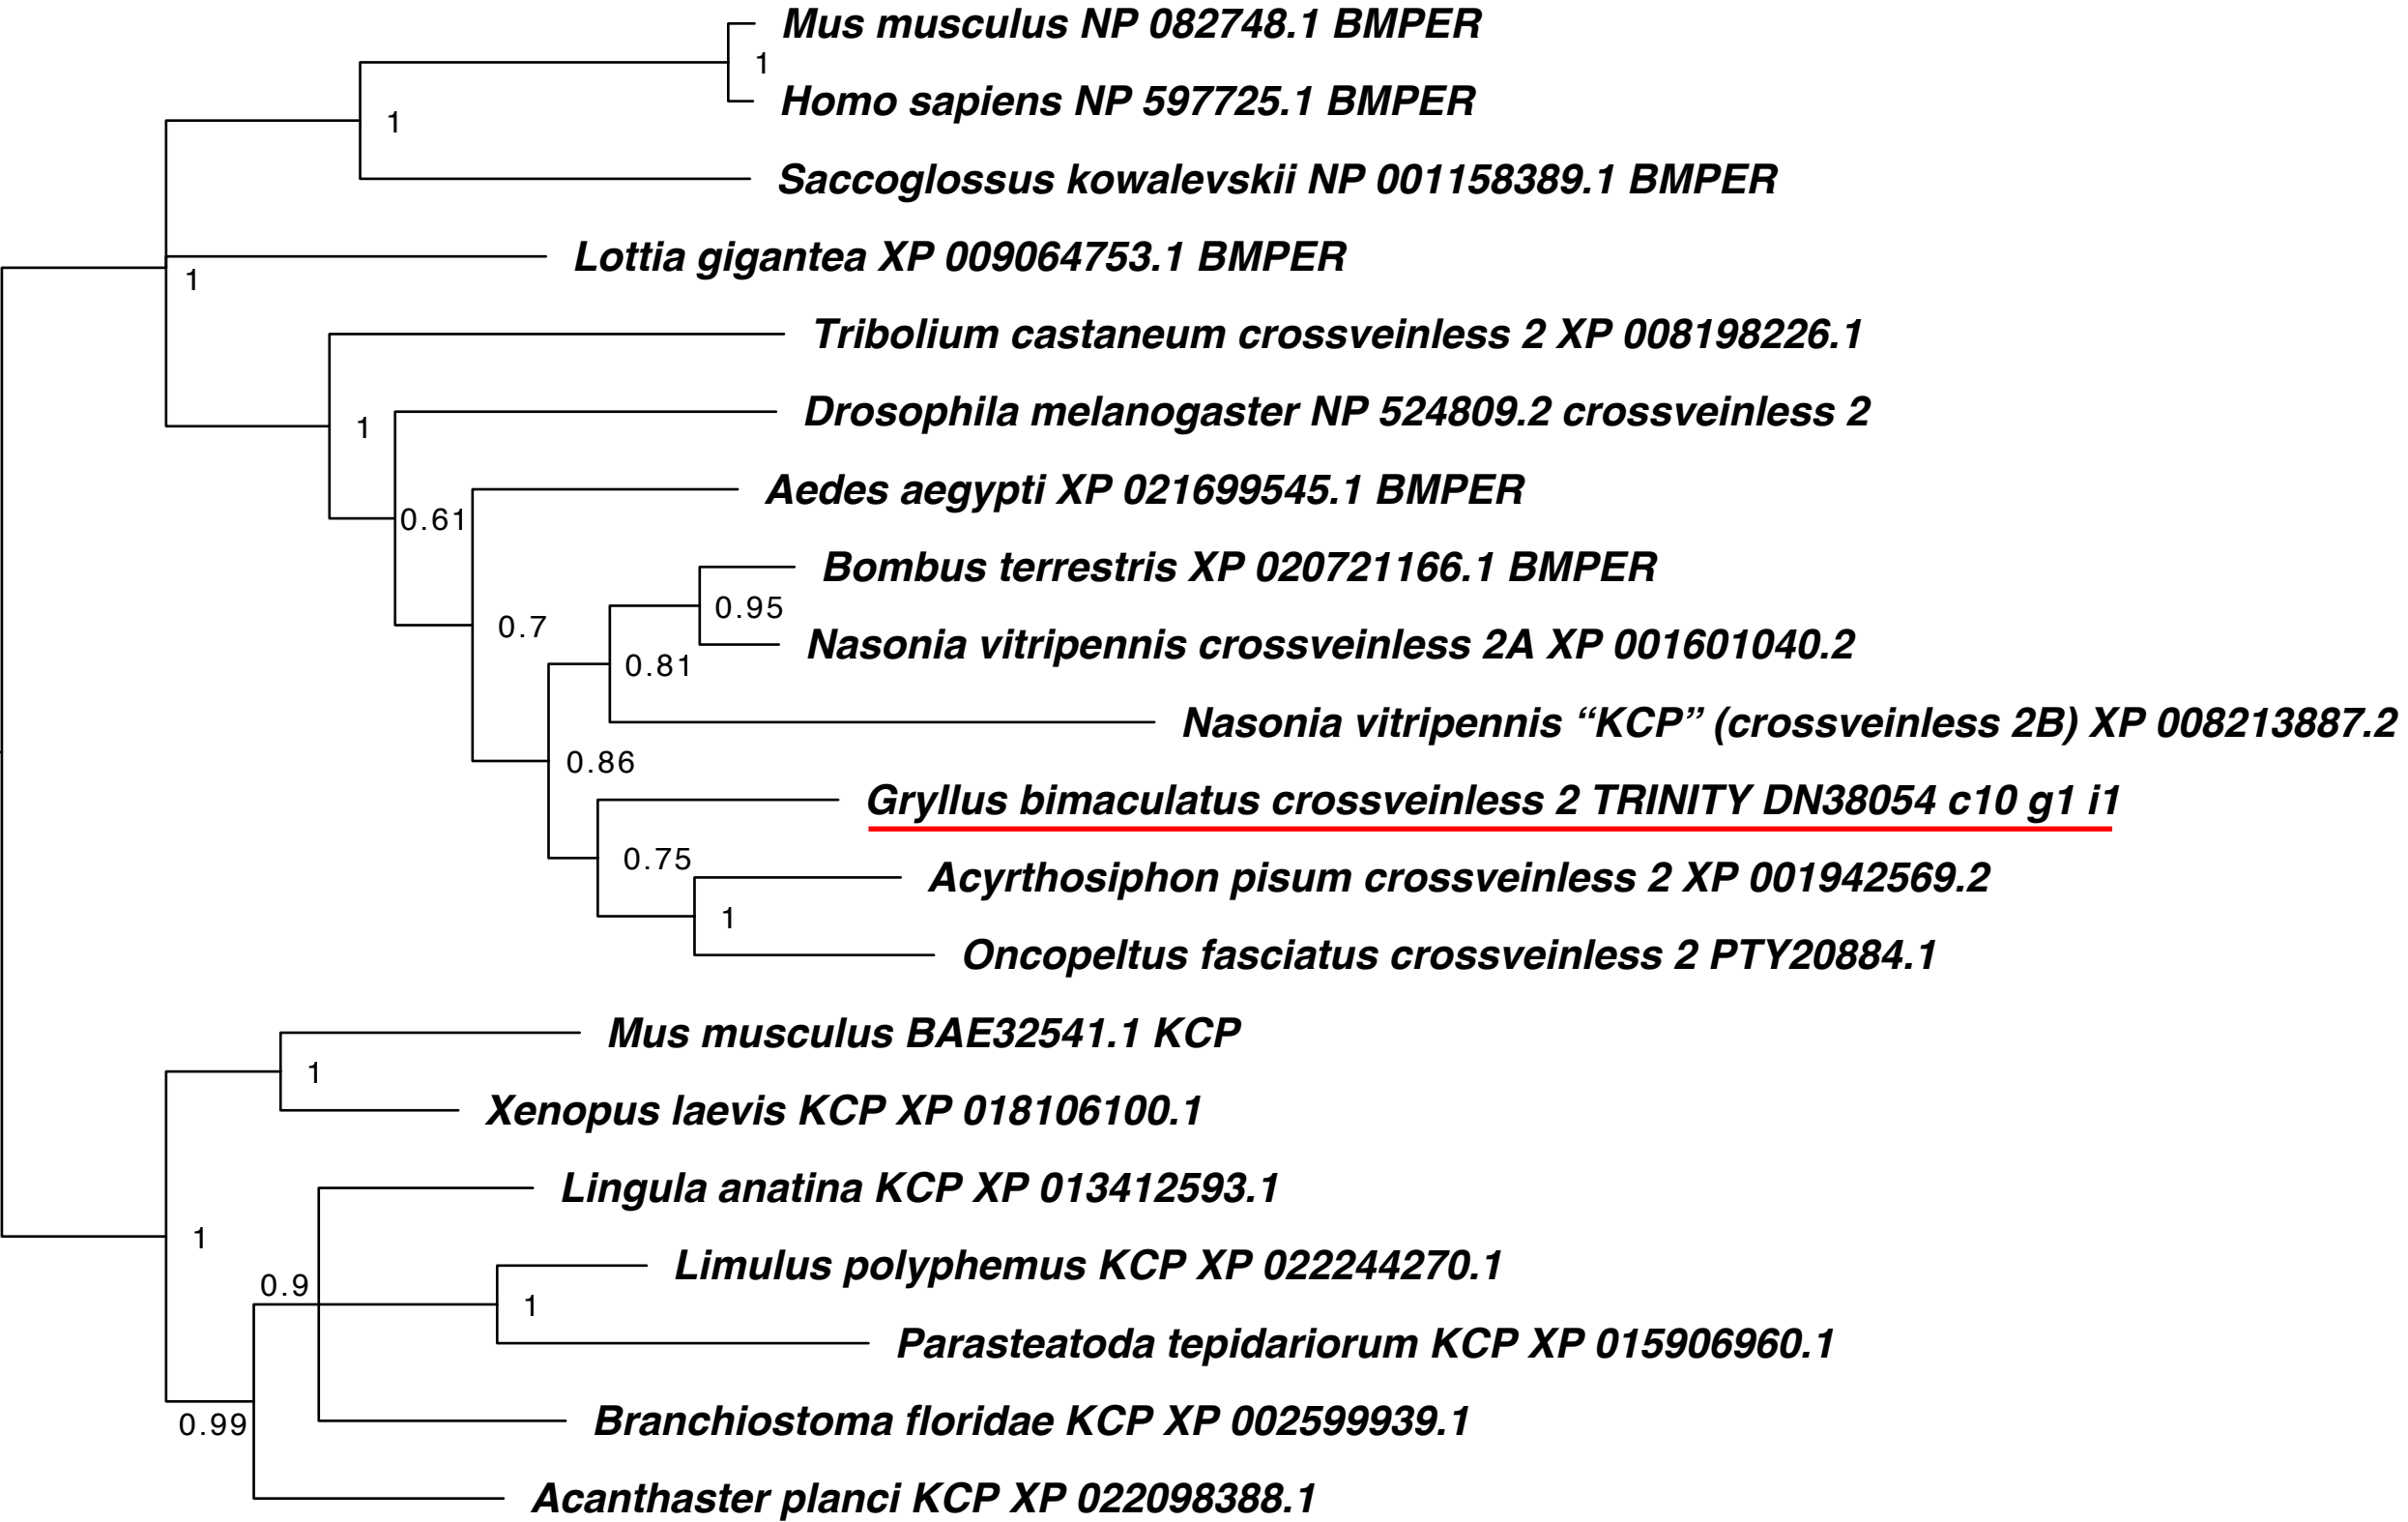

0.2

Supplement: supp3 [file elife-68287-supp3-v2.zip]

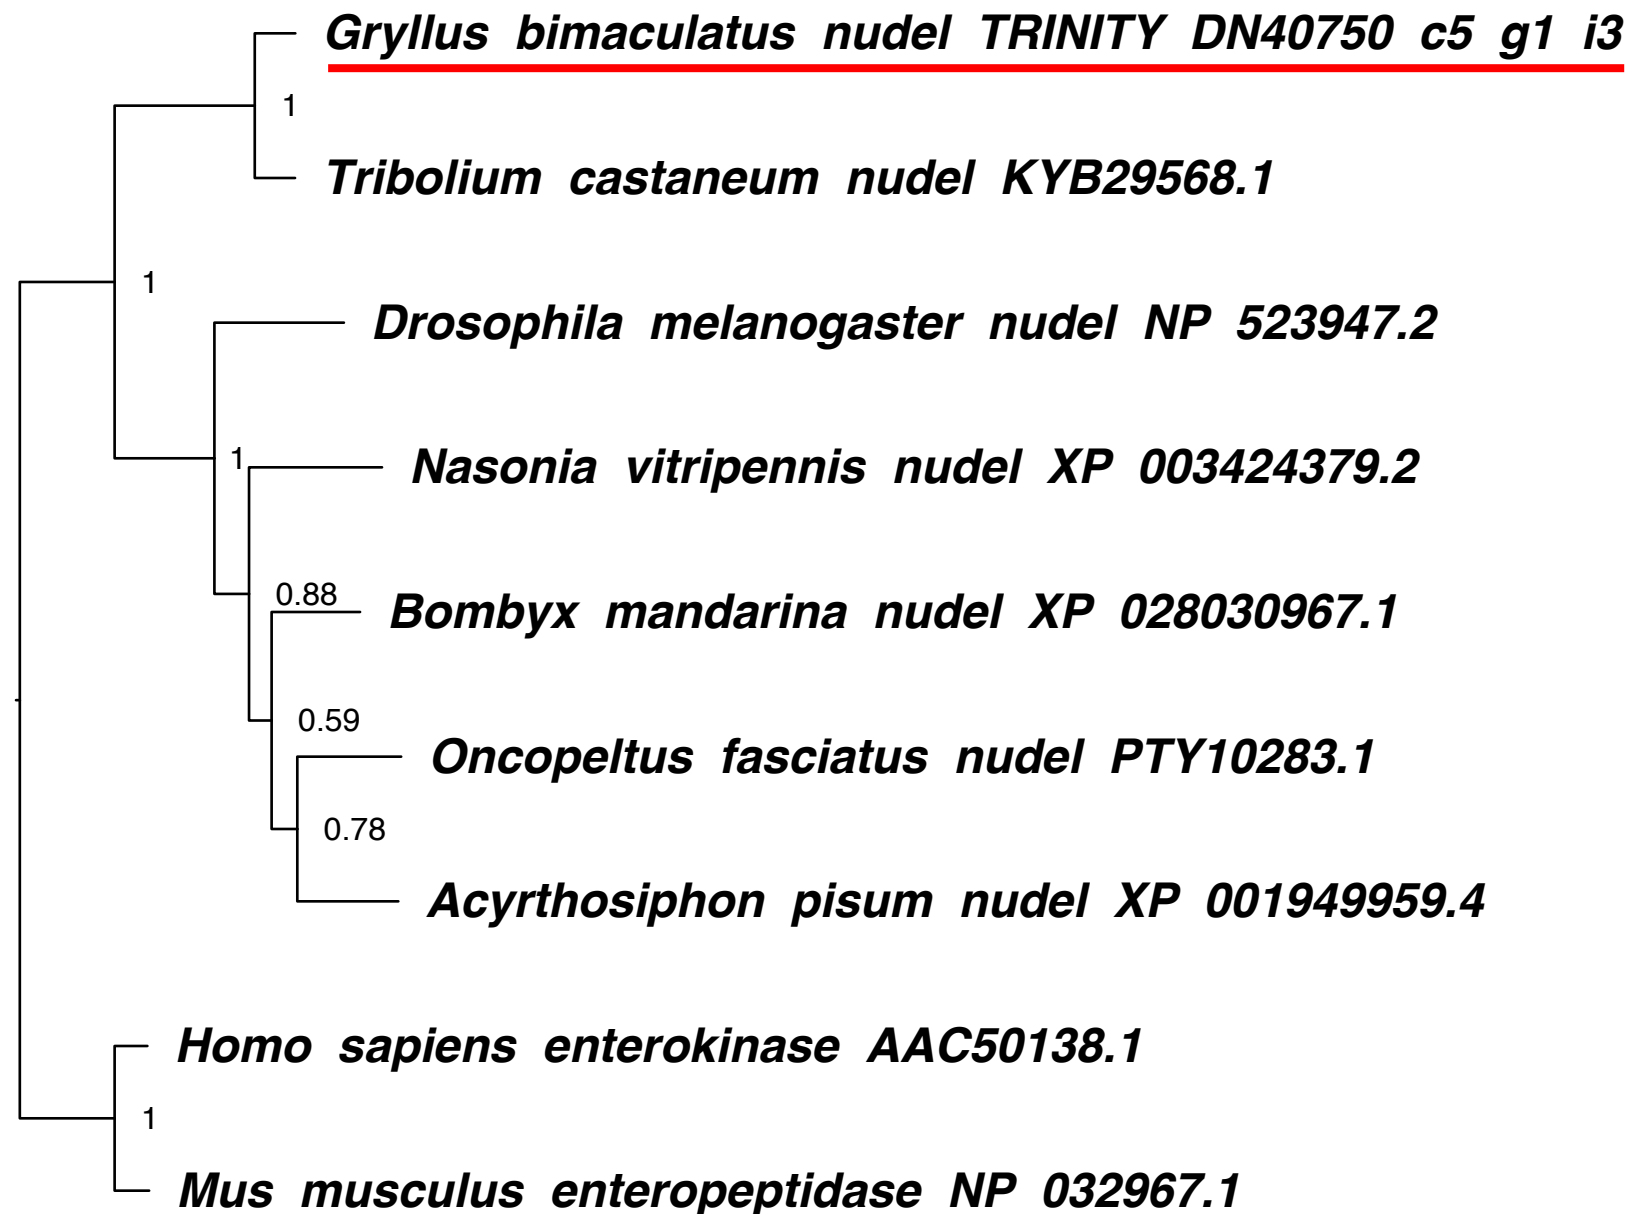

Supplement: supp3 [file elife-68287-supp3-v2.zip]

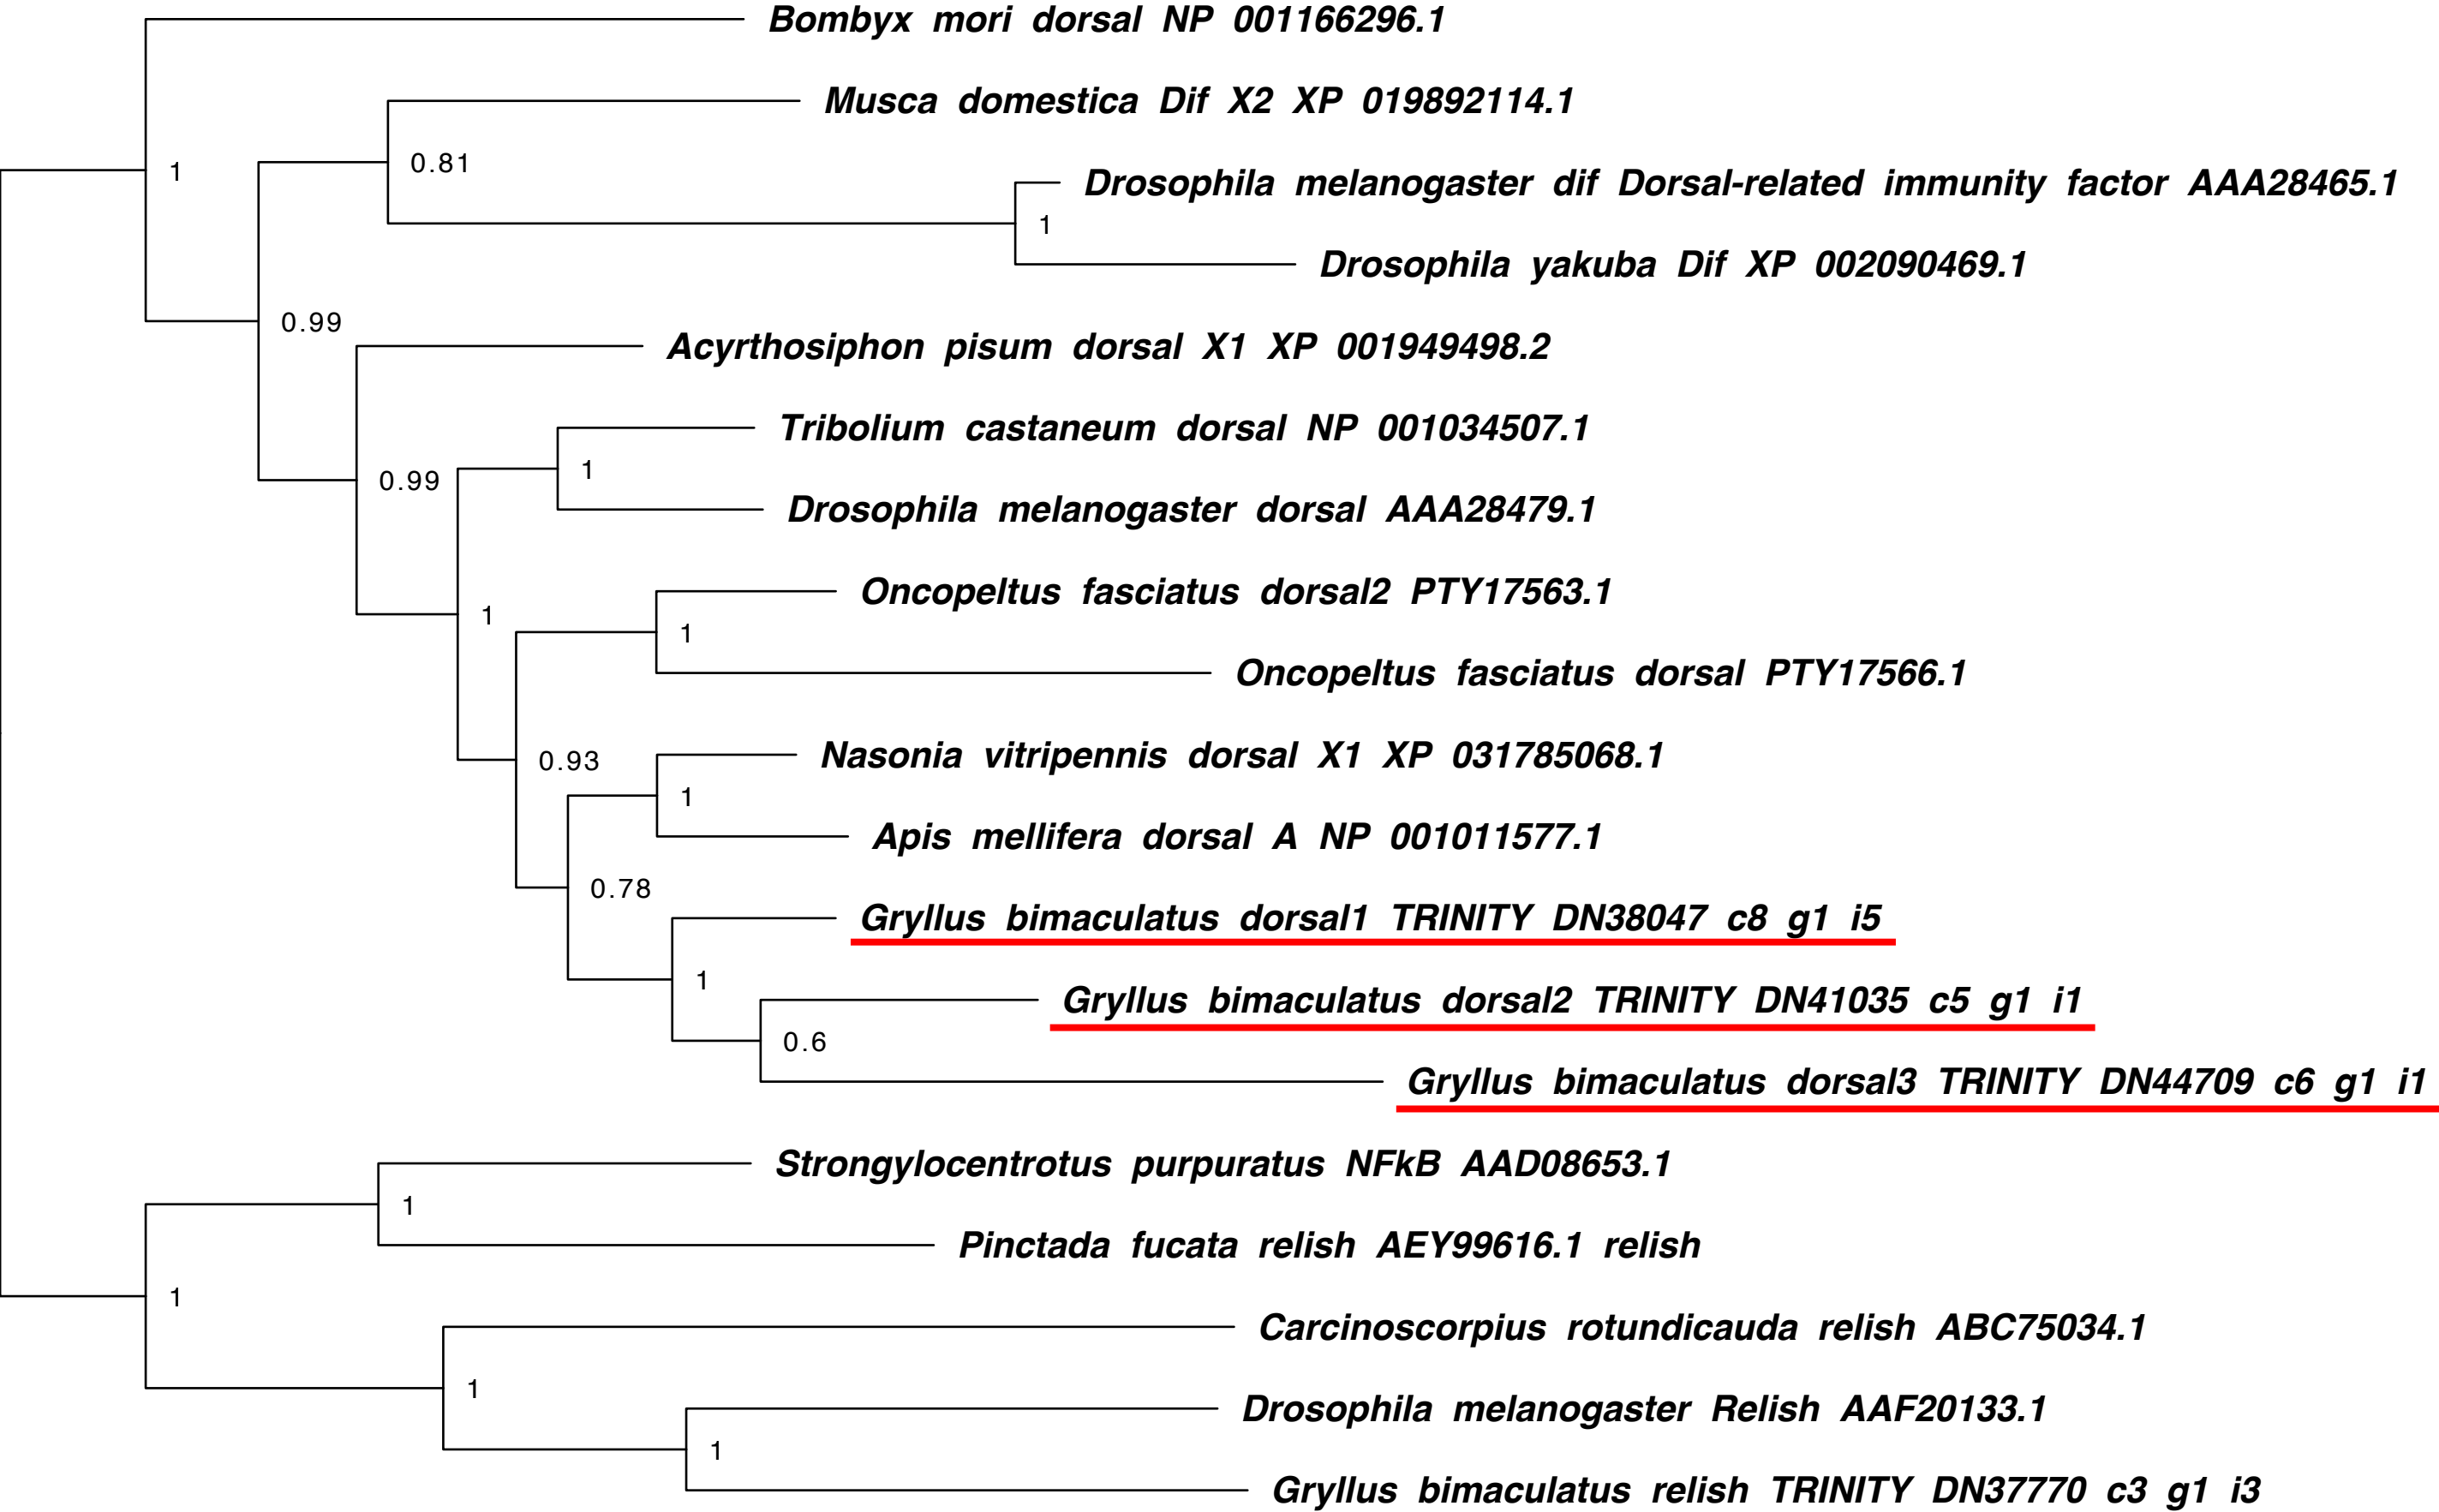

0.2

Supplement: supp3 [file elife-68287-supp3-v2.zip]

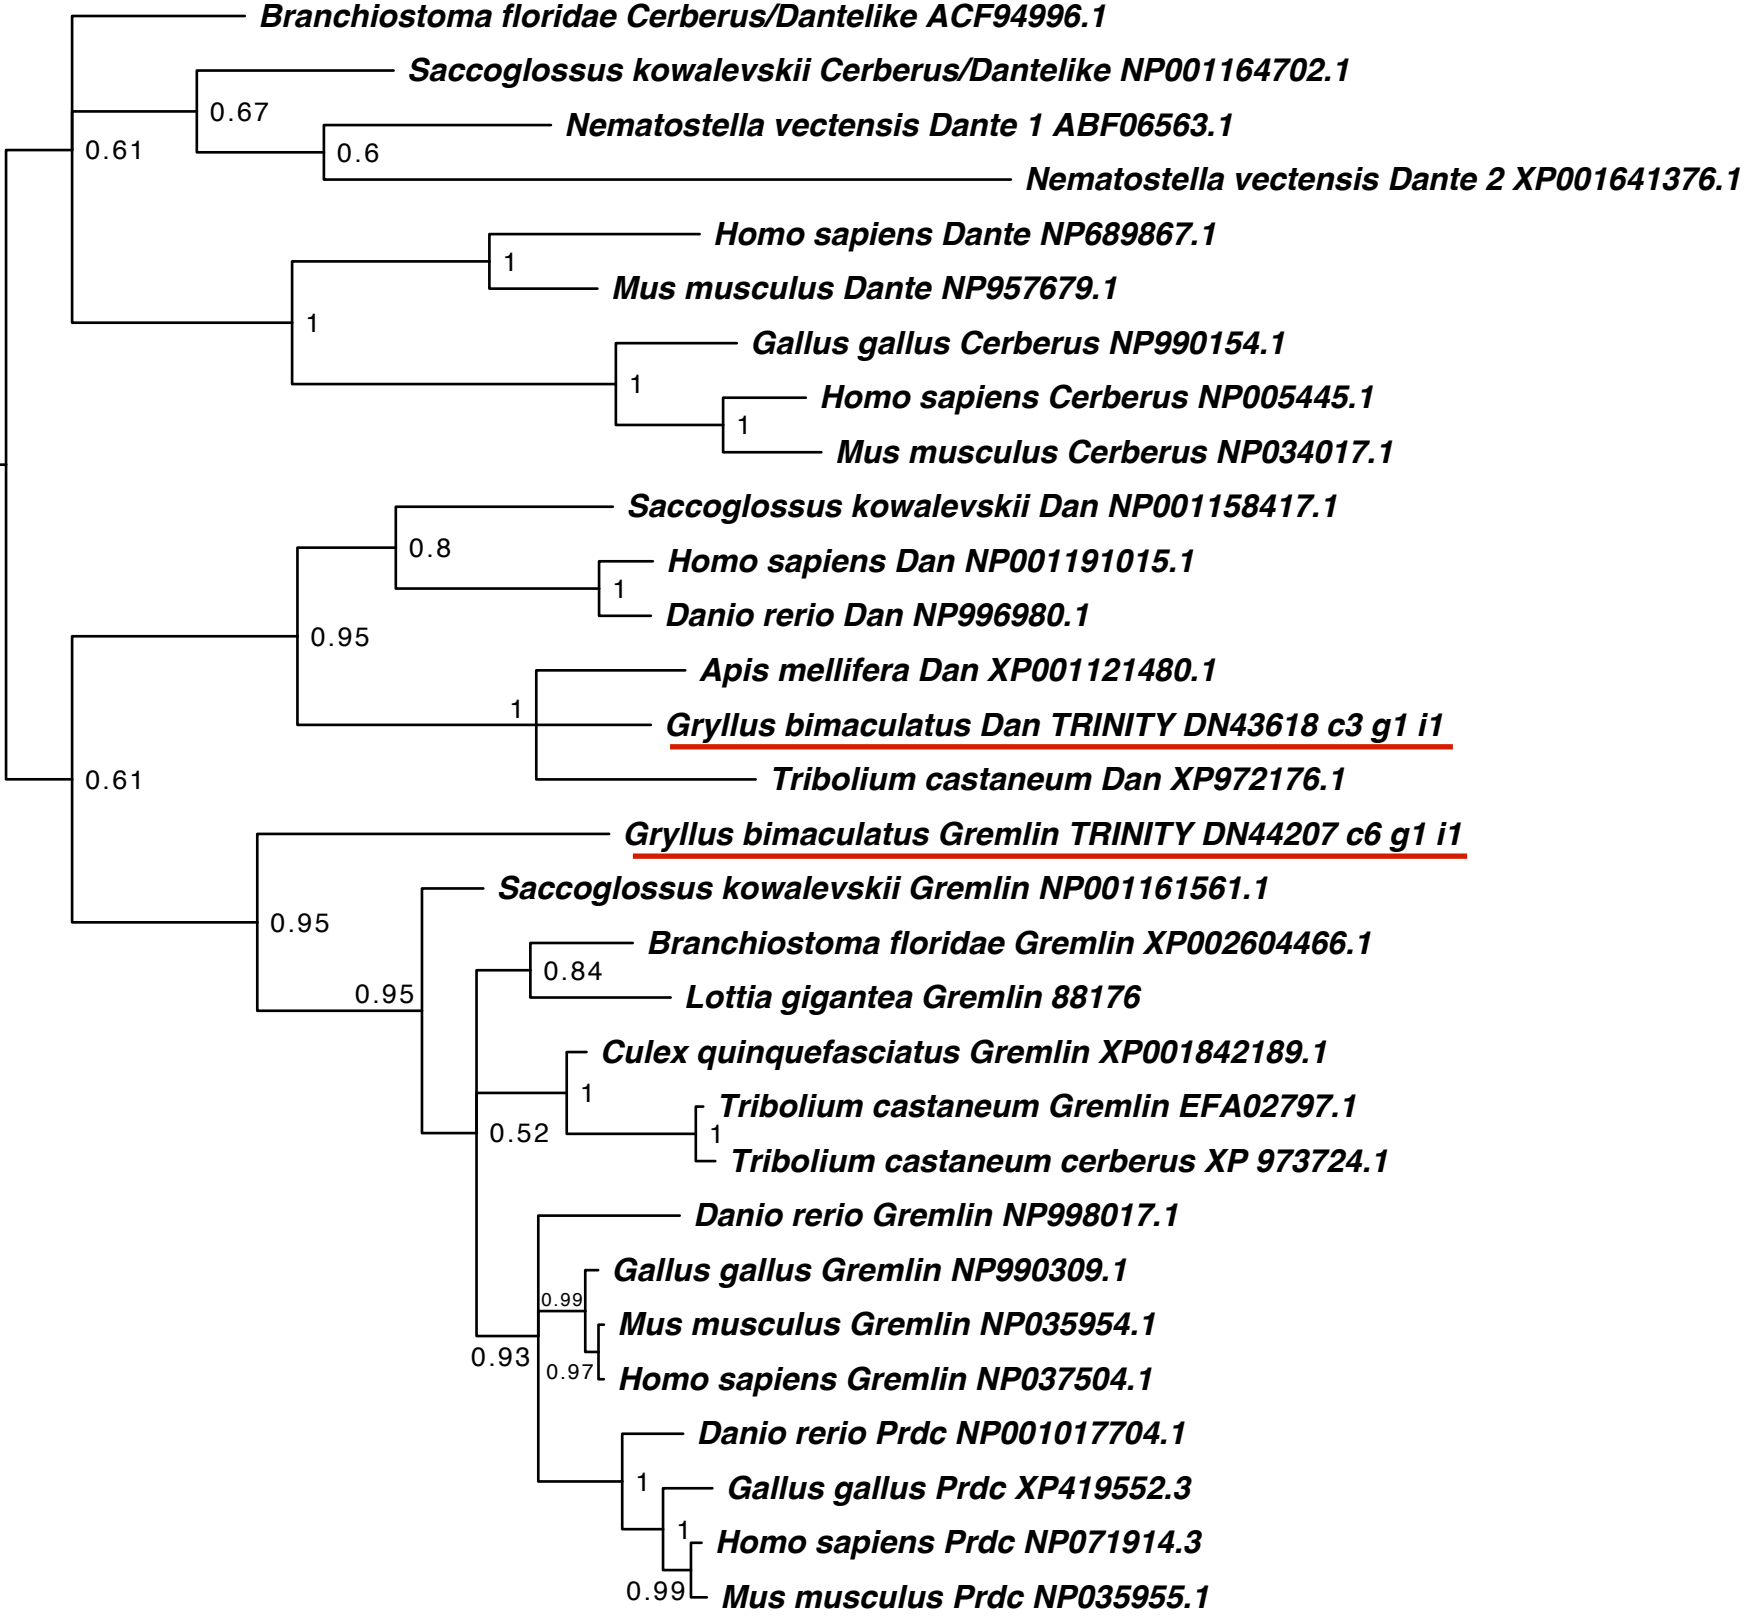

0.3

Supplement: supp3 [file elife-68287-supp3-v2.zip]

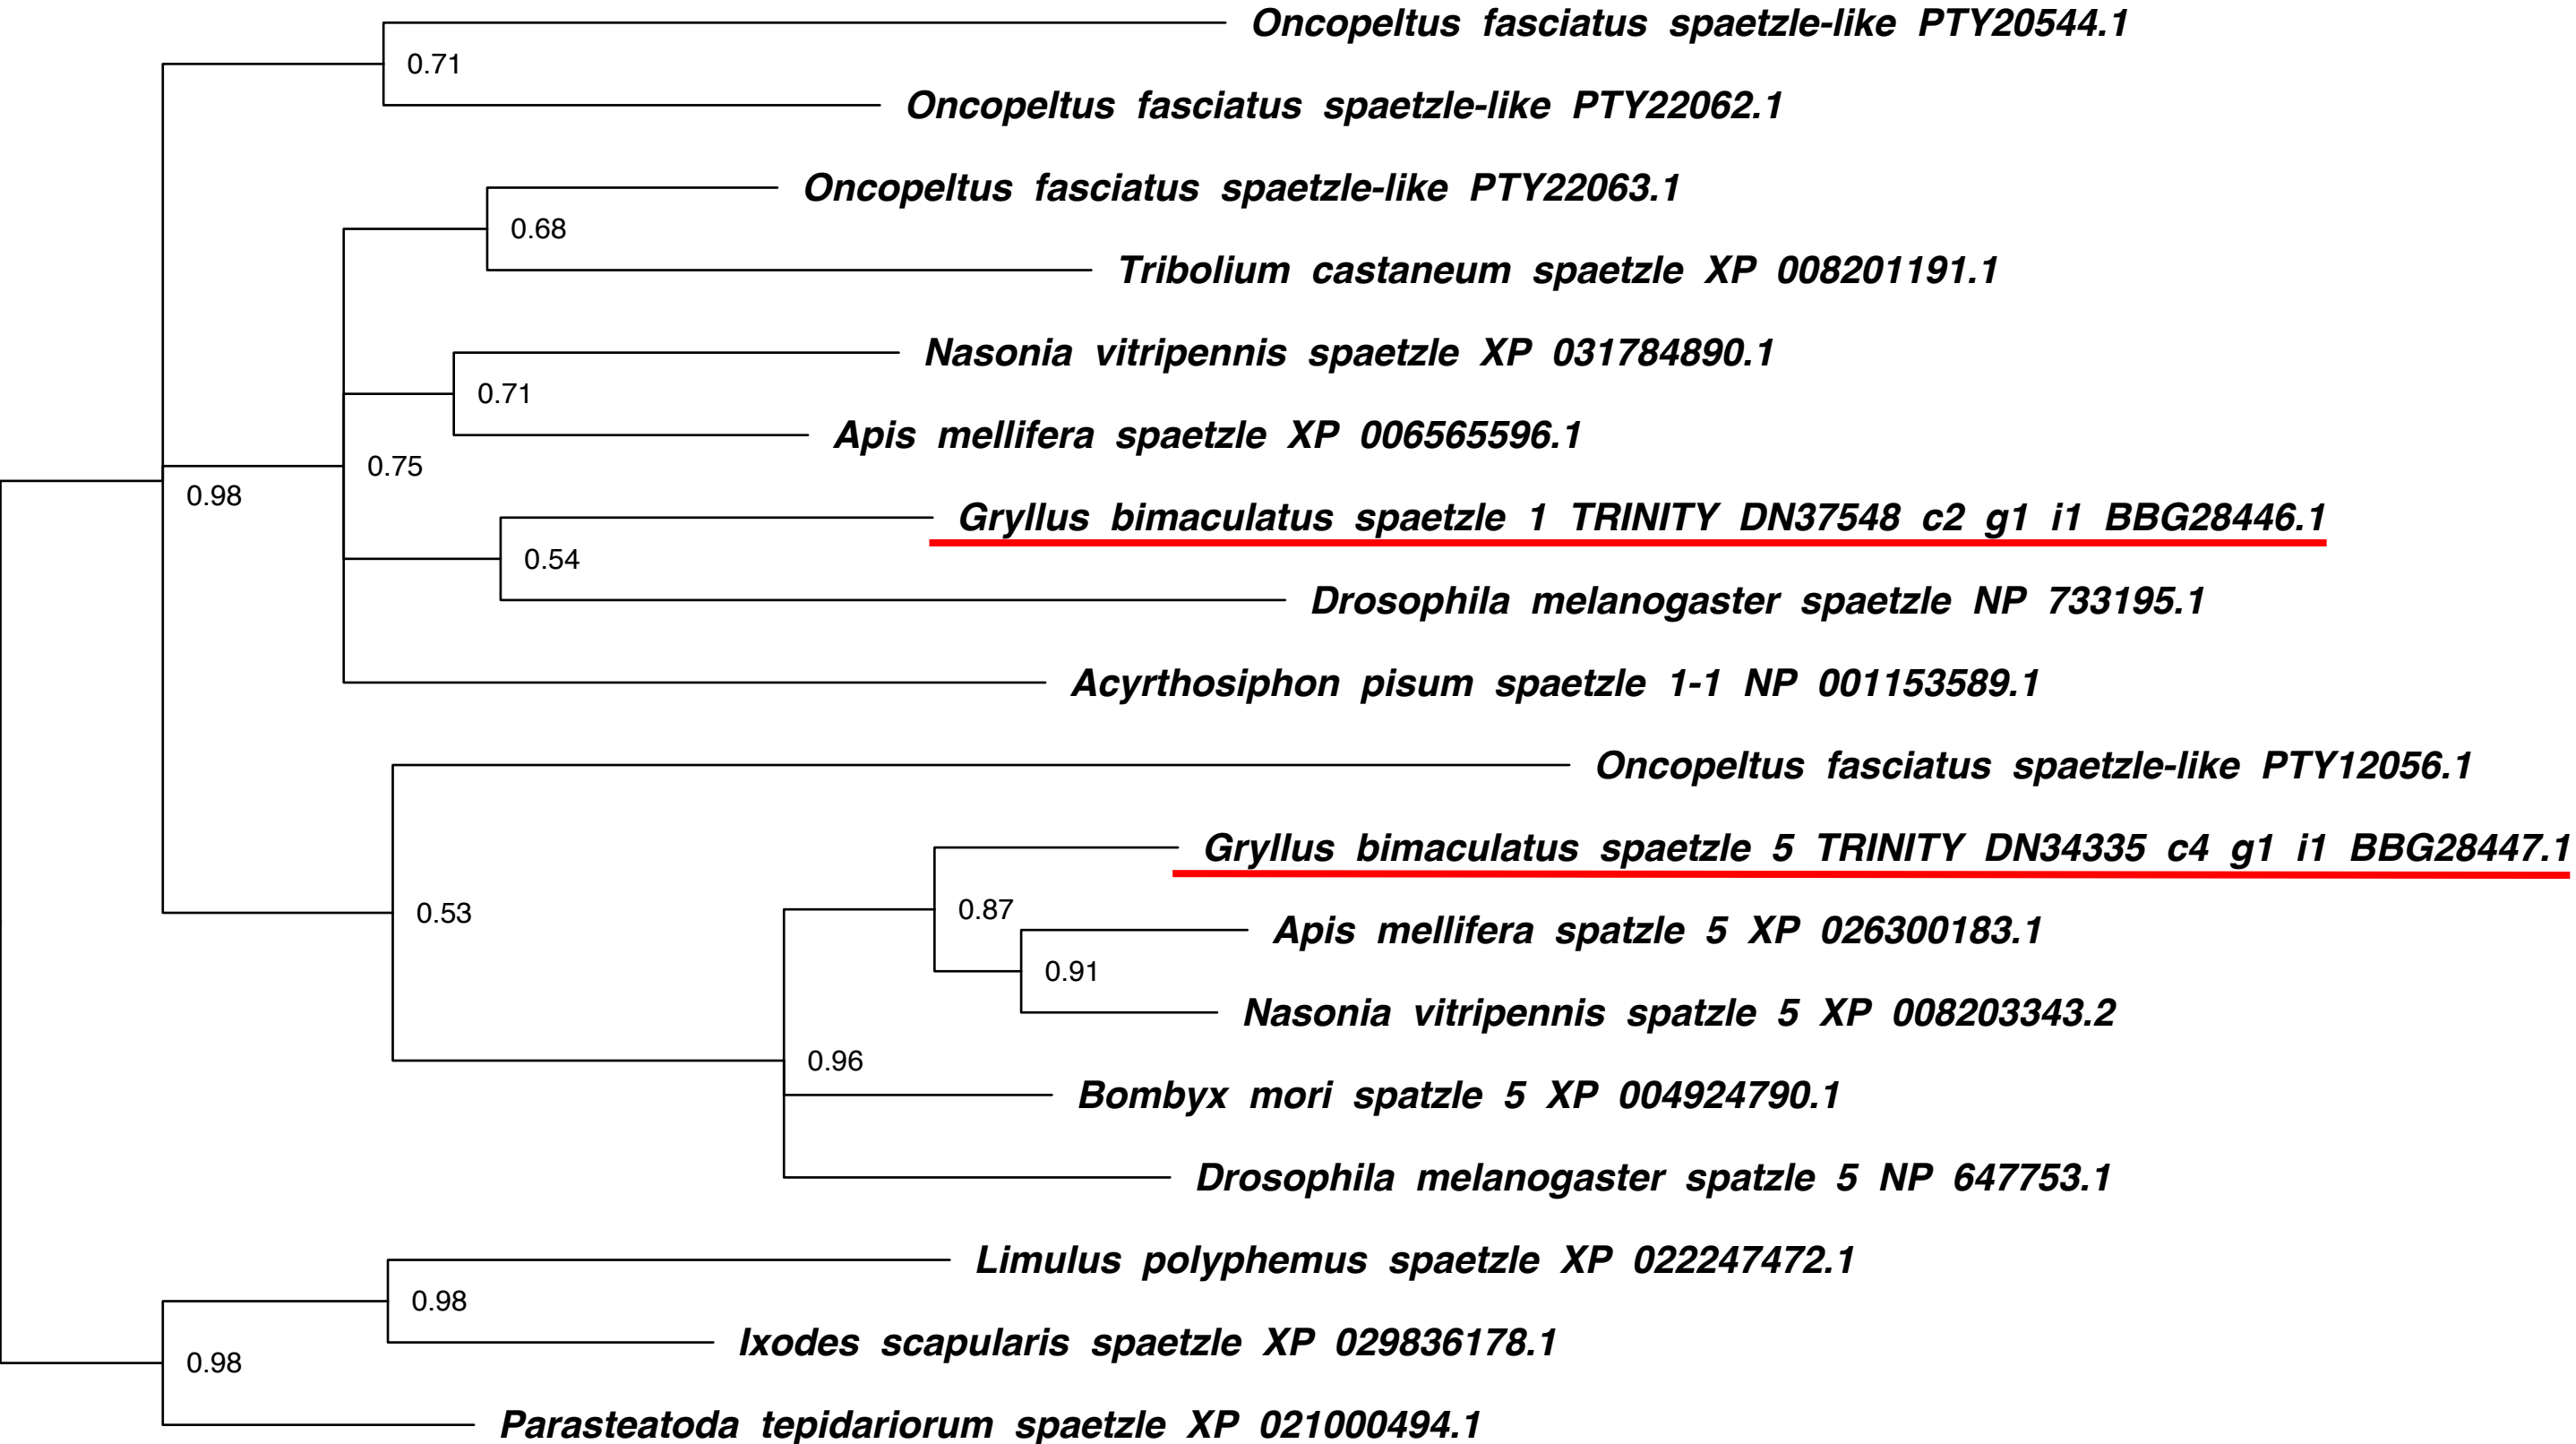

0.2

Supplement: supp3 [file elife-68287-supp3-v2.zip]

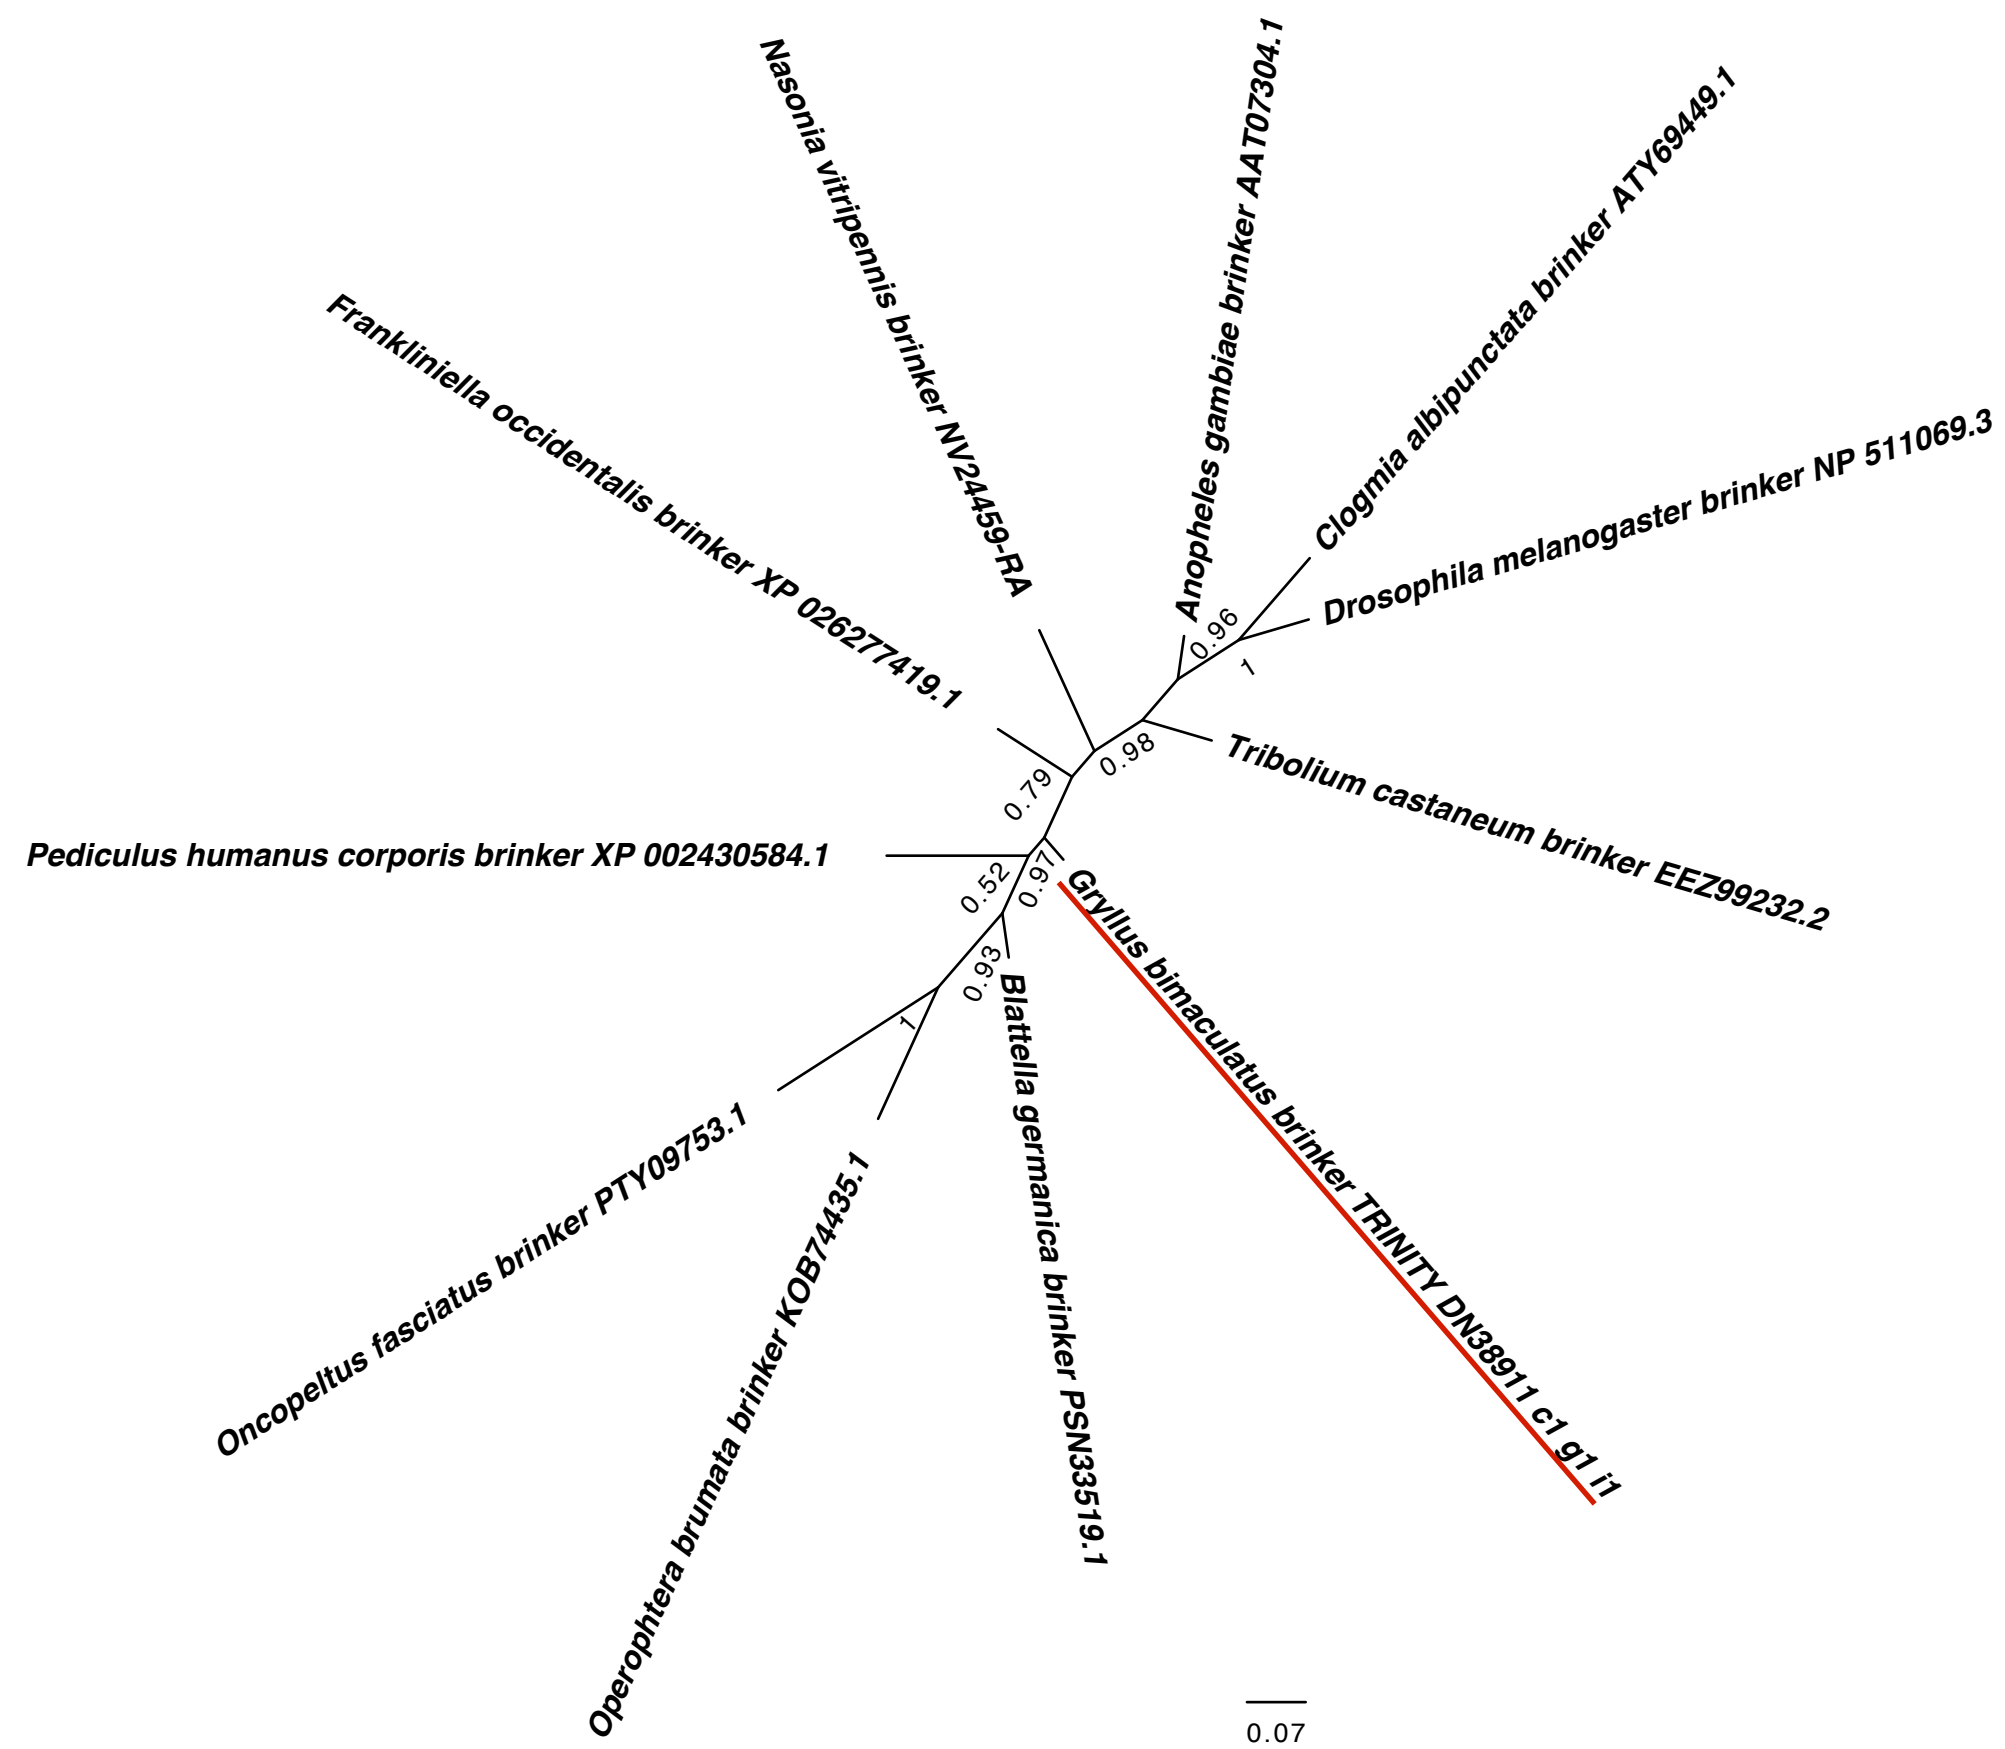

Supplement: supp3 [file elife-68287-supp3-v2.zip]

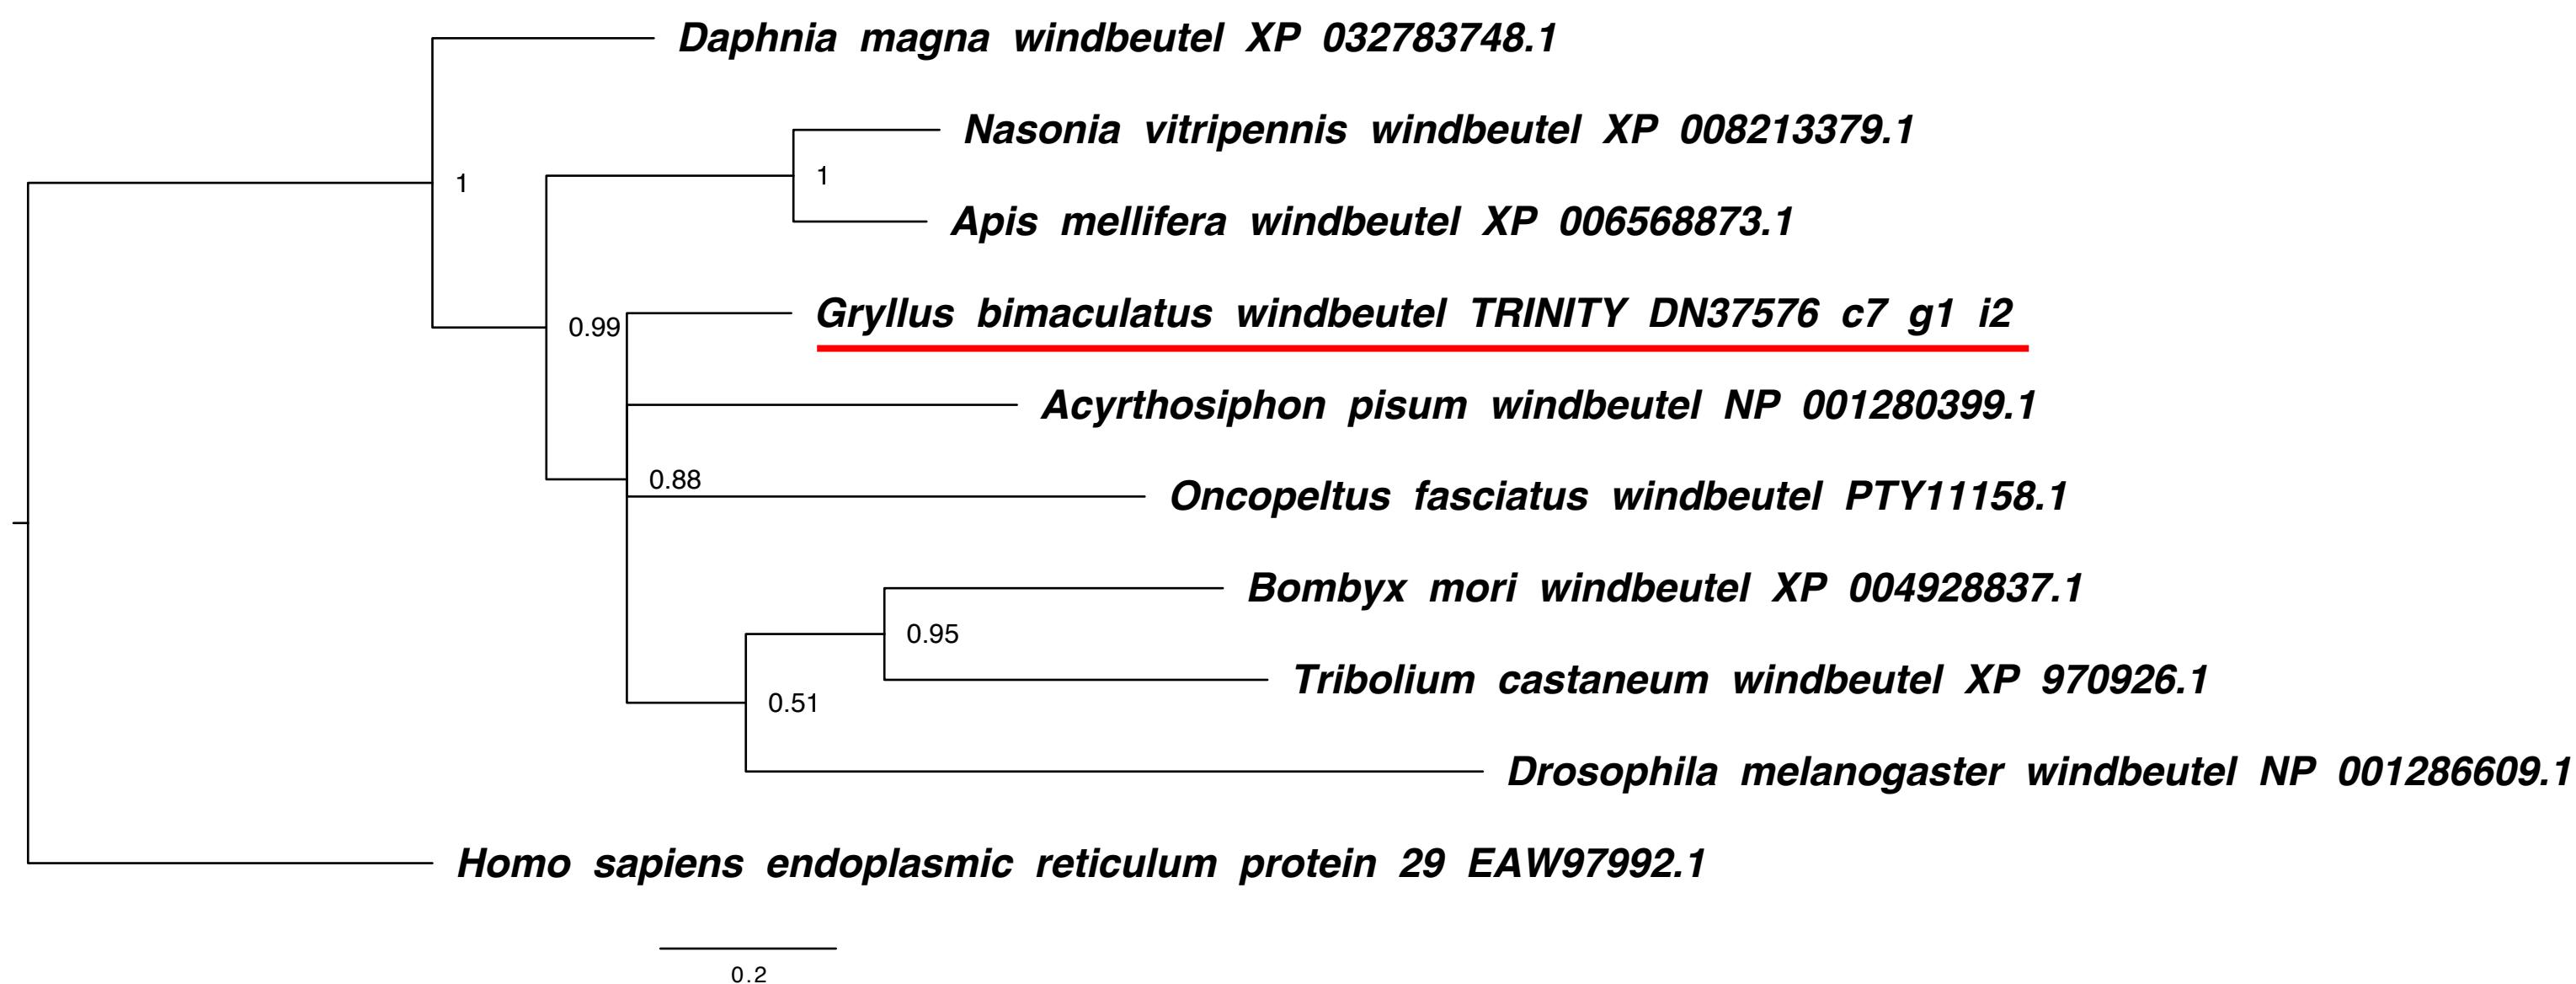

Supplement: supp3 [file elife-68287-supp3-v2.zip]

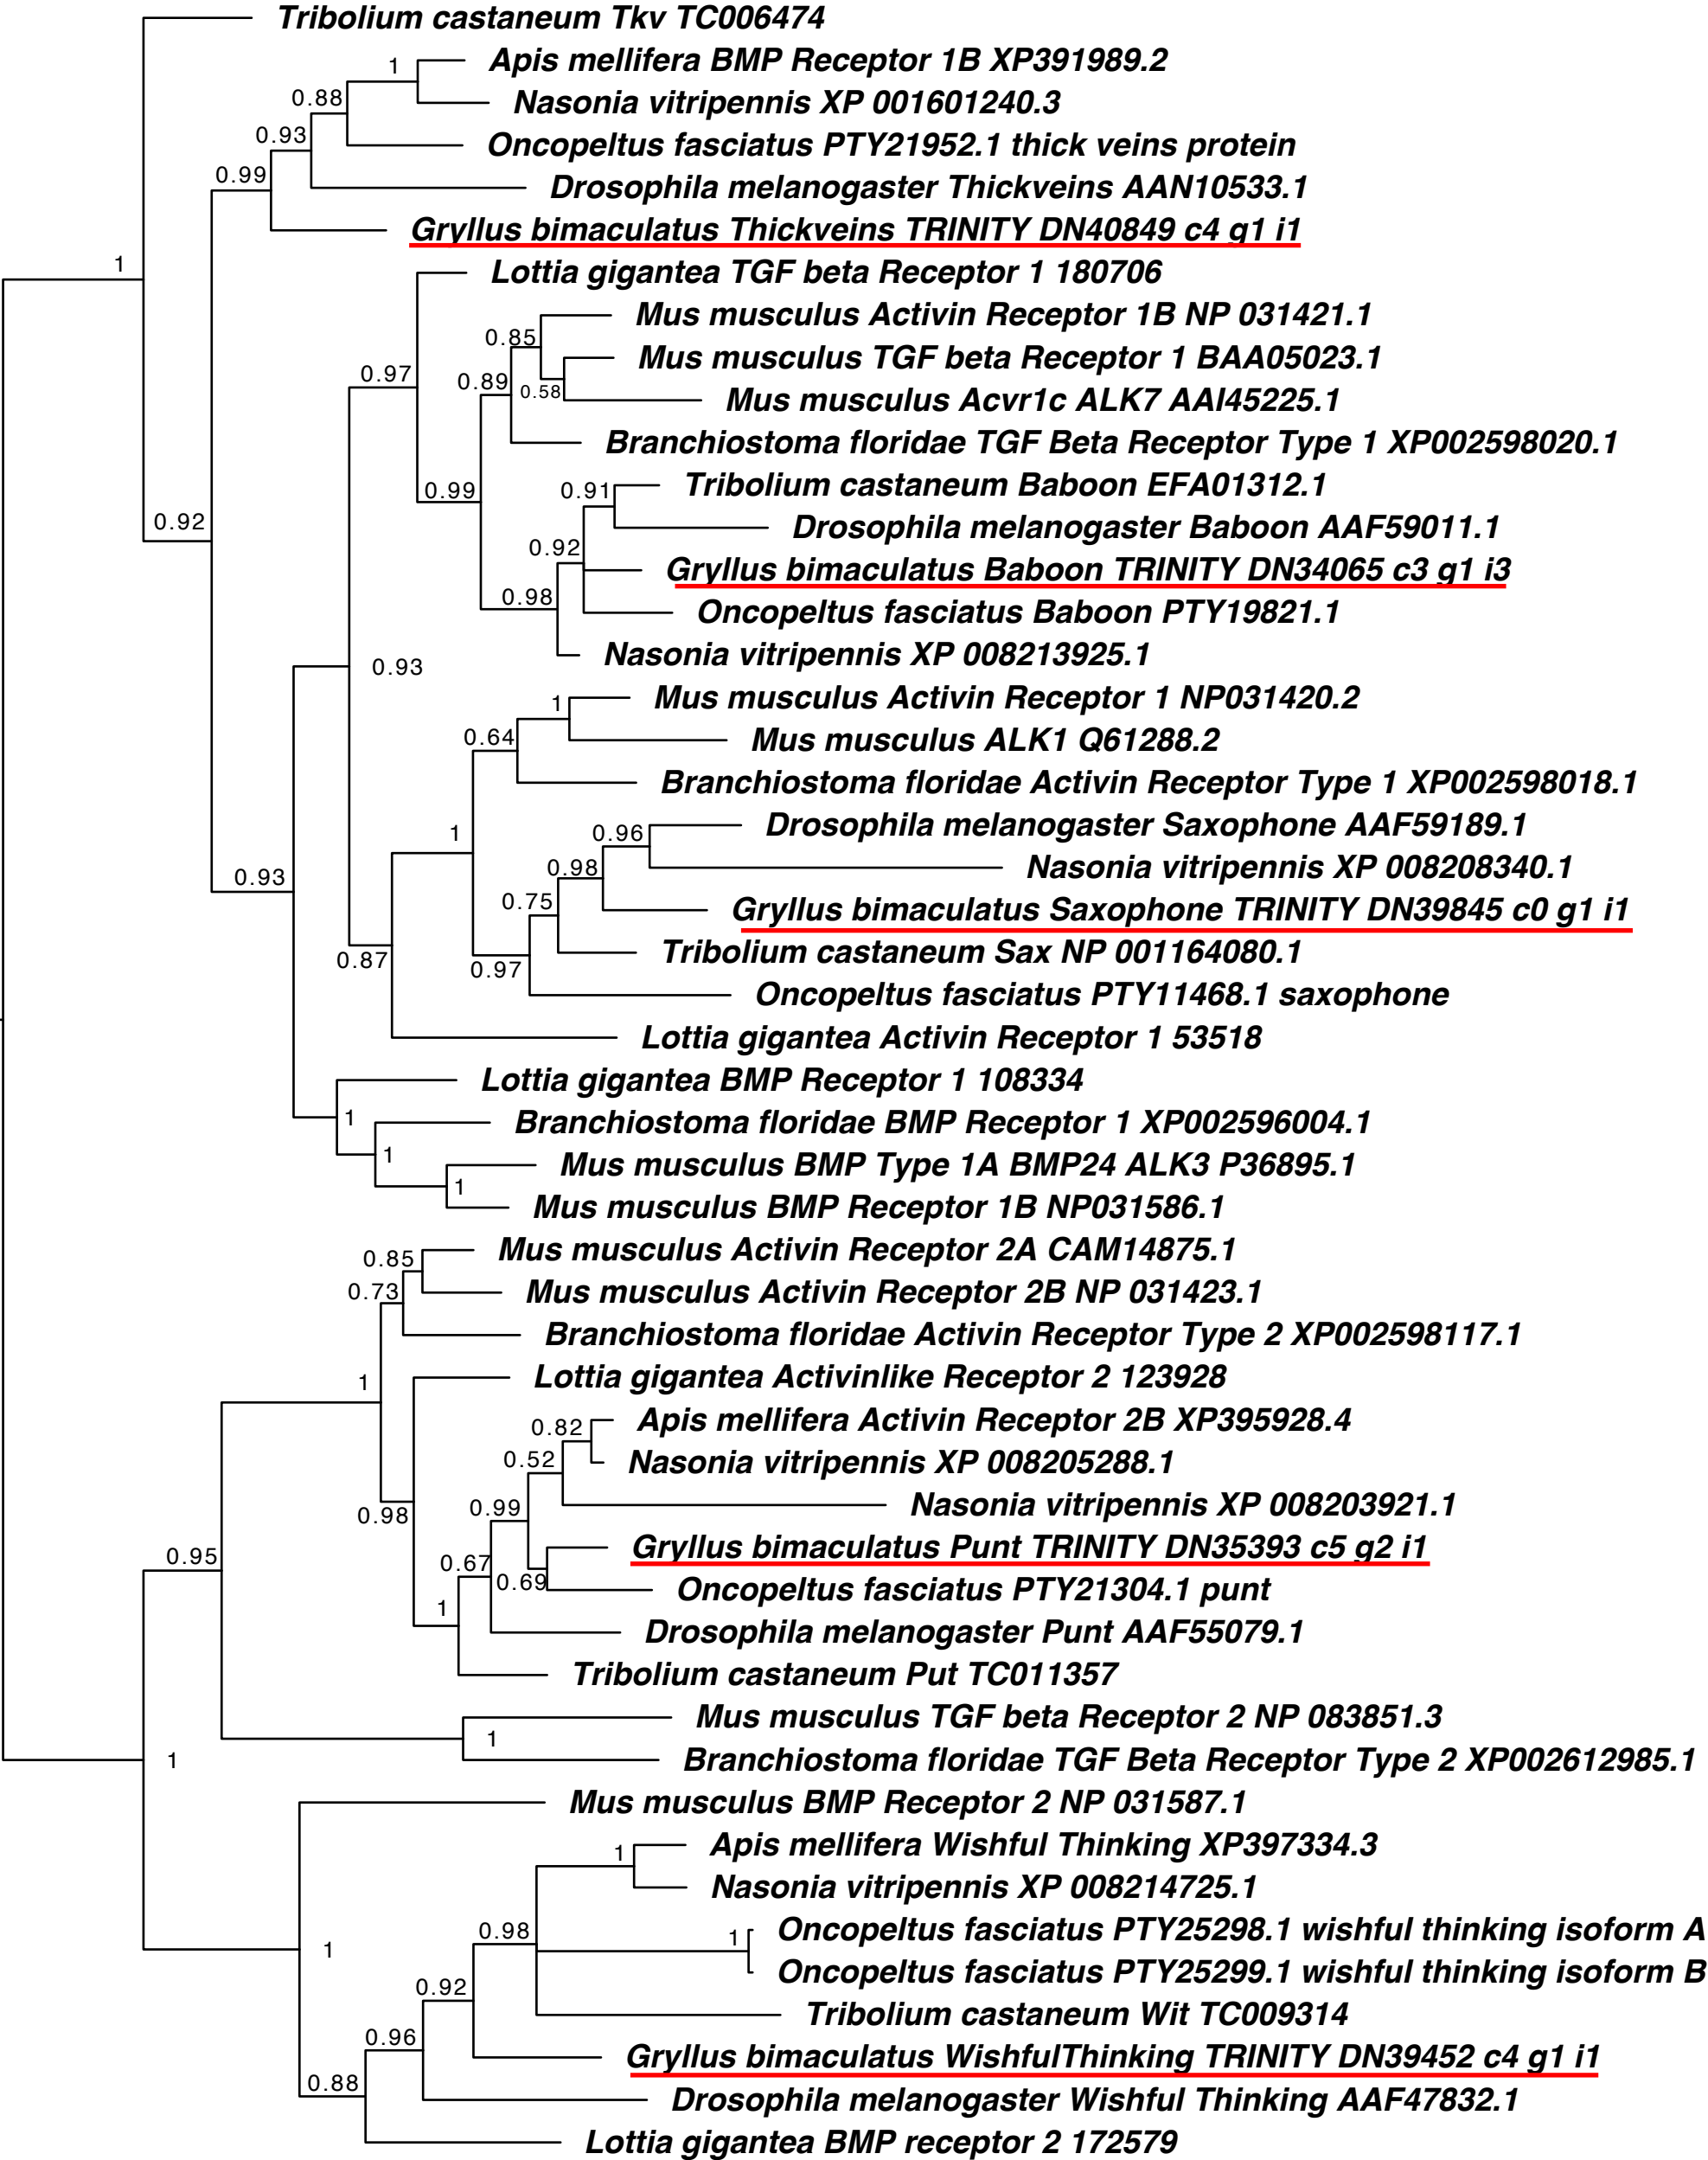

0.2

Supplement: supp3 [file elife-68287-supp3-v2.zip]

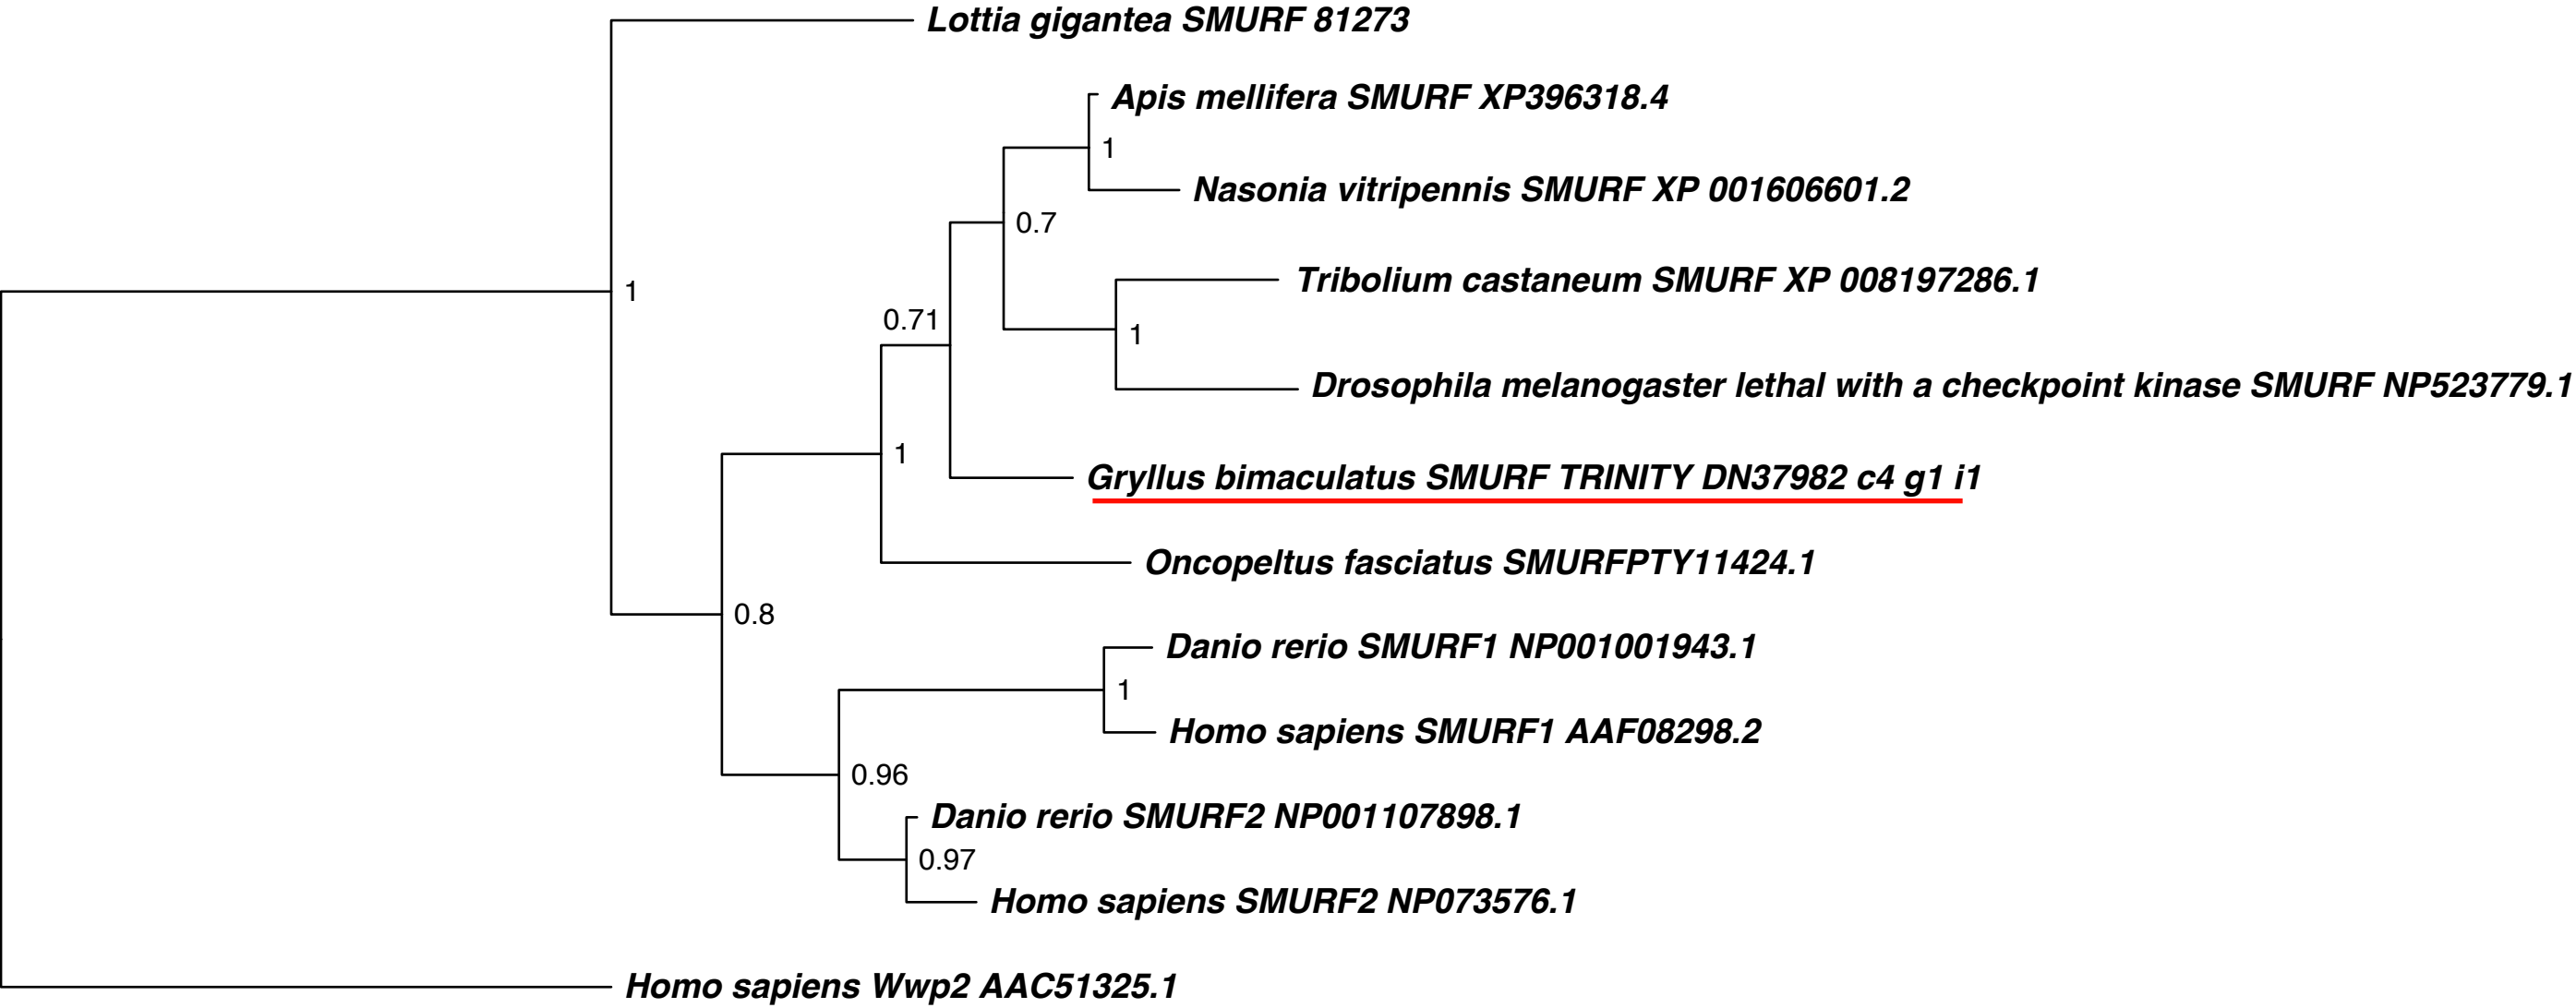

0.08

Supplement: supp3 [file elife-68287-supp3-v2.zip]

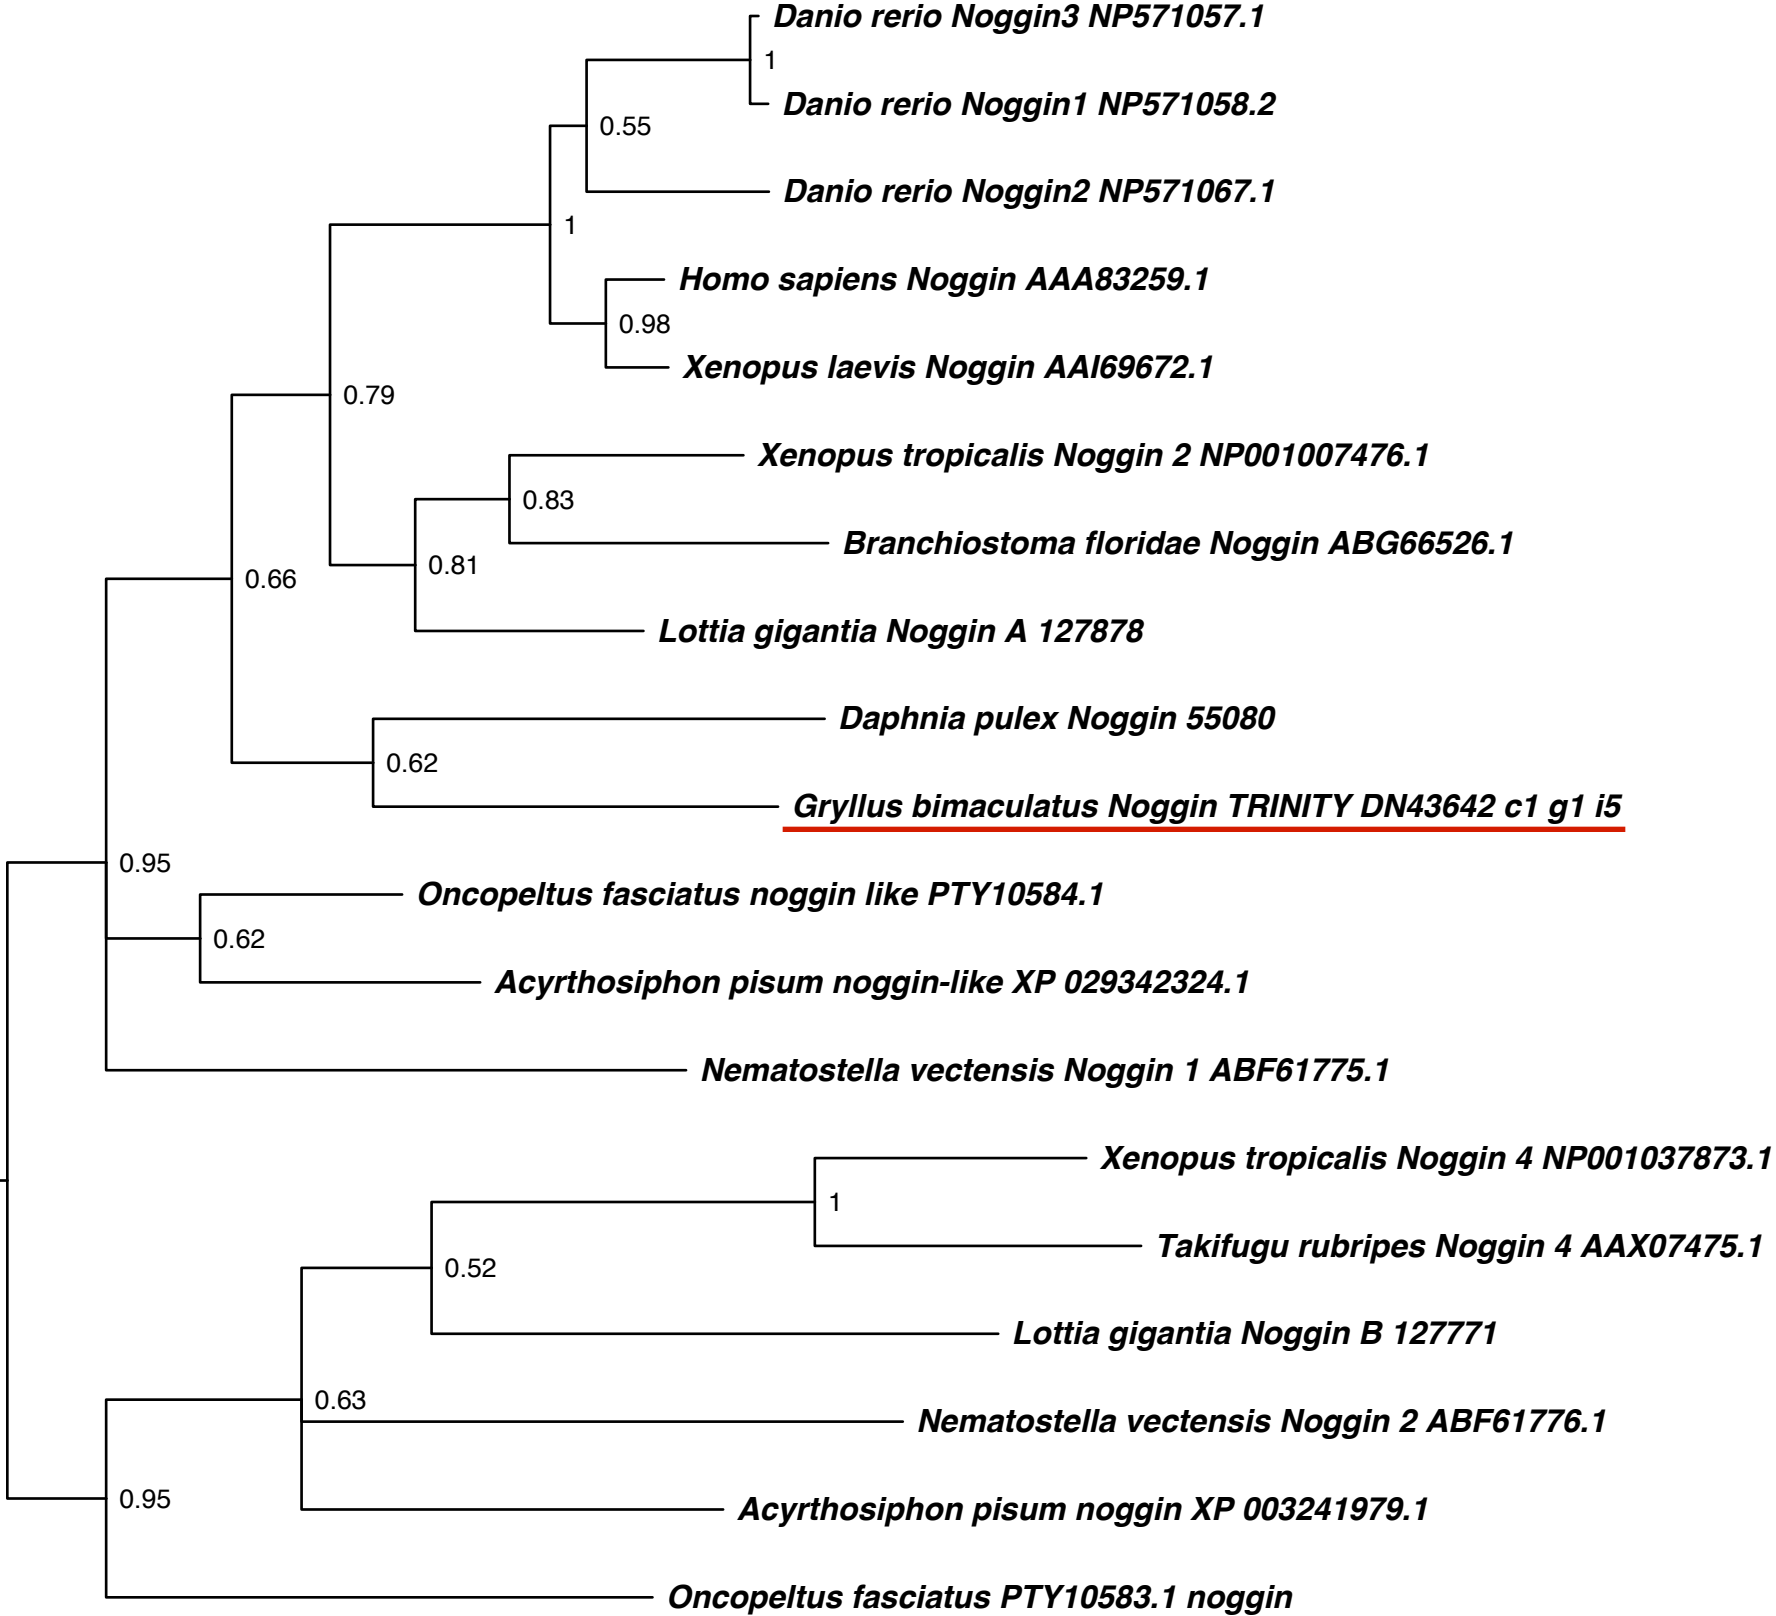

0.2

Supplement: supp3 [file elife-68287-supp3-v2.zip]

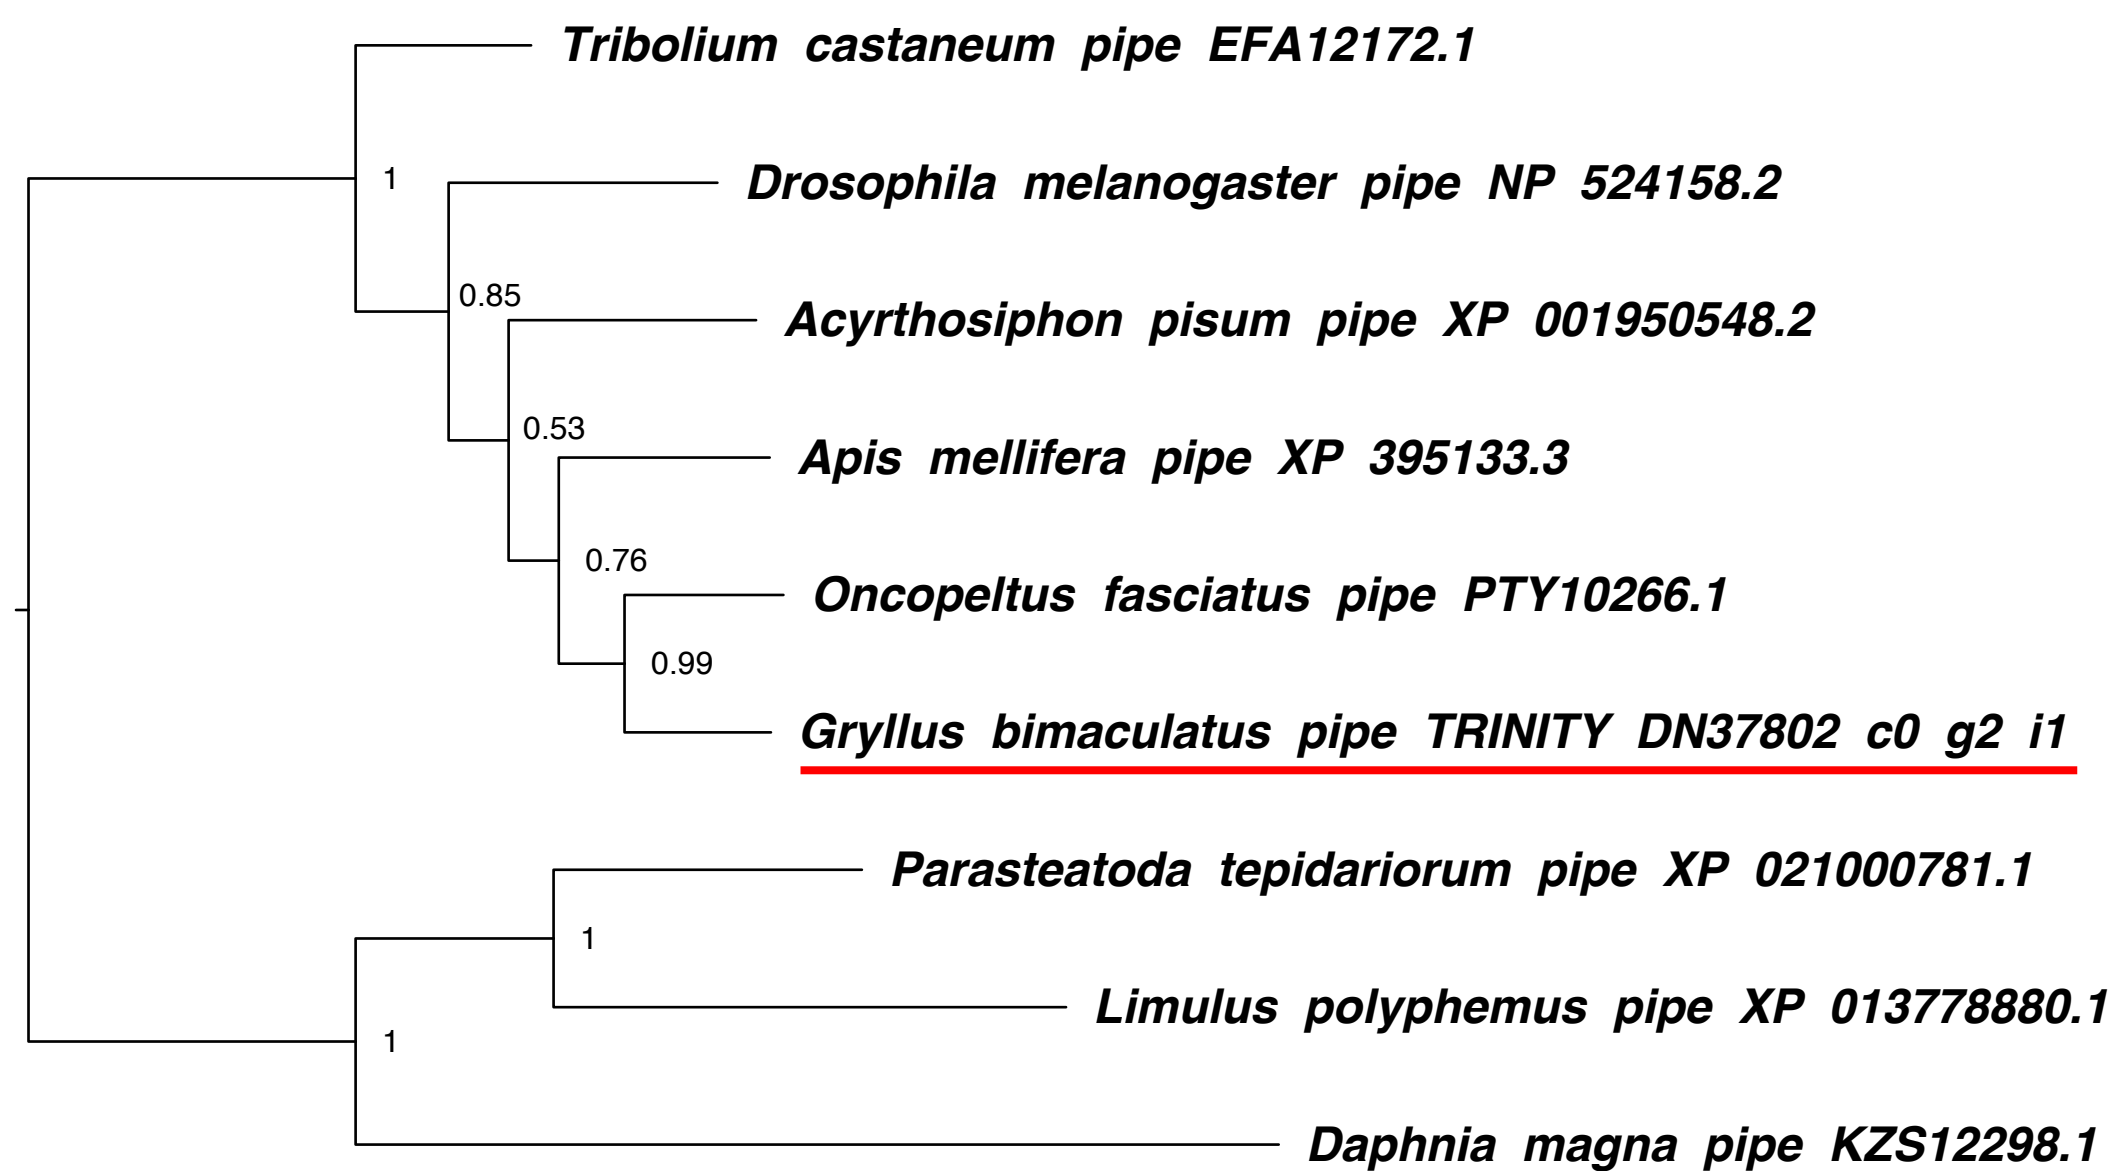

0.2

Supplement: supp3 [file elife-68287-supp3-v2.zip]

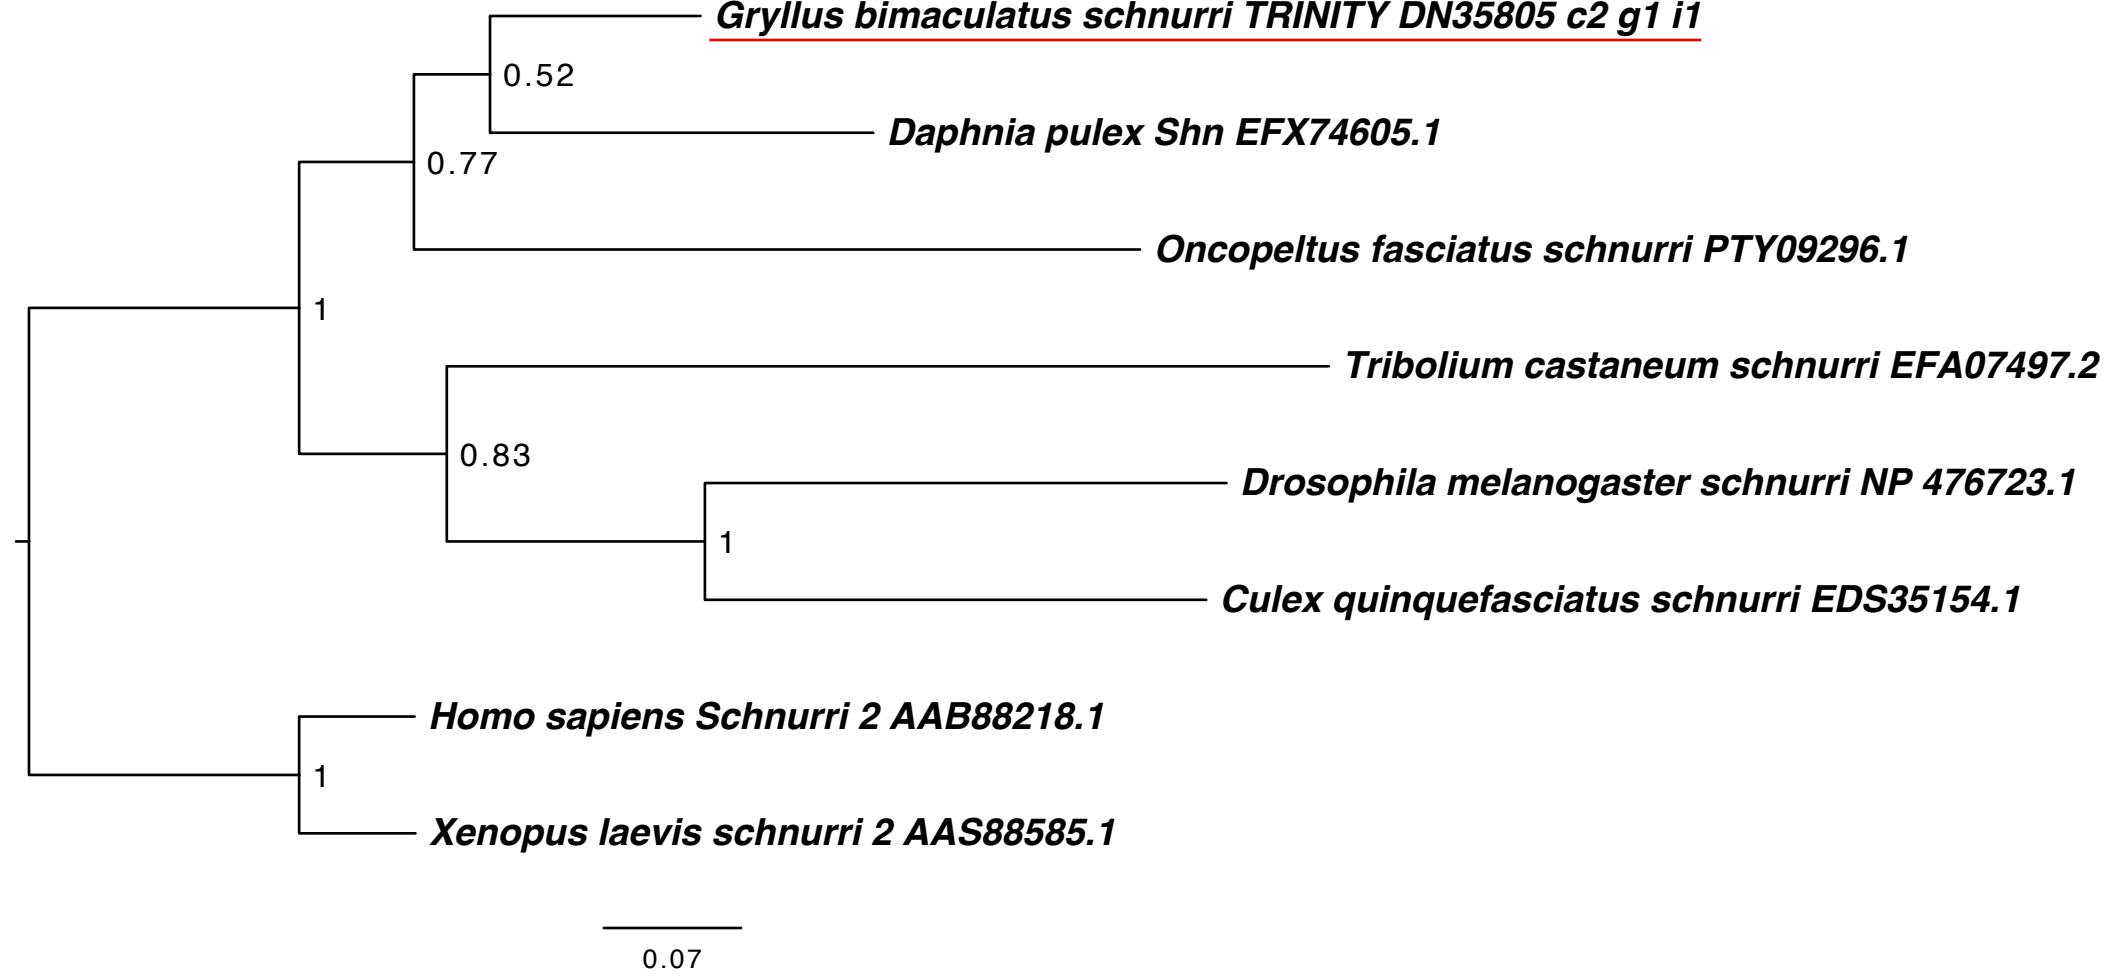

Supplement: supp3 [file elife-68287-supp3-v2.zip]

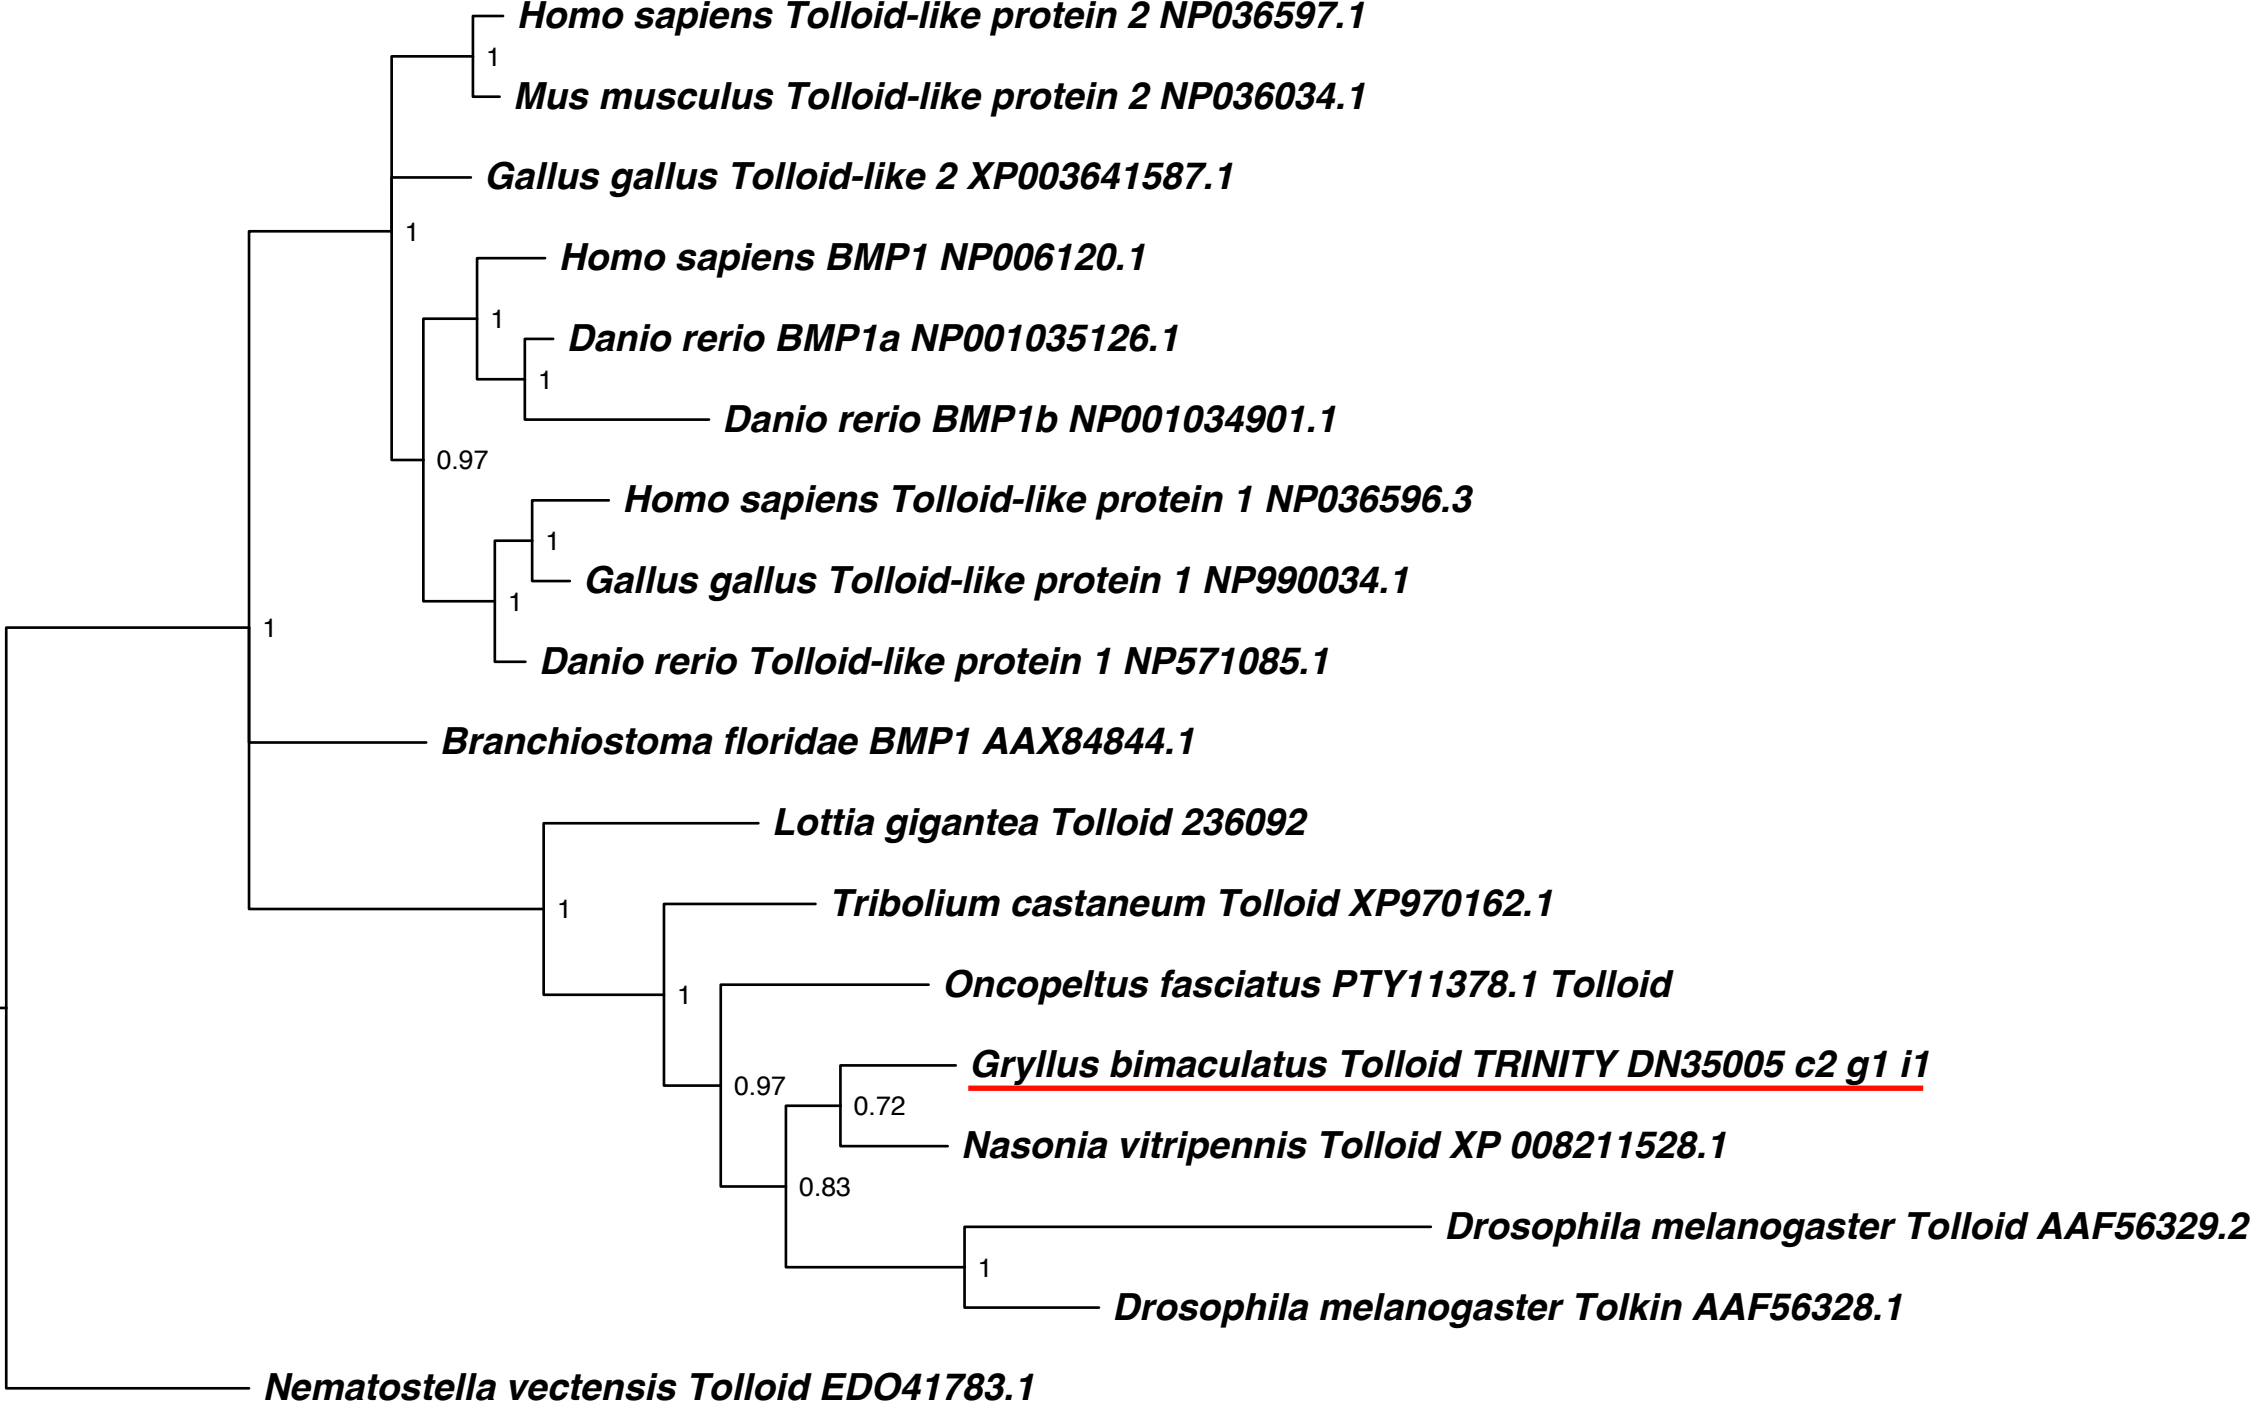

0.2

Supplement: supp3 [file elife-68287-supp3-v2.zip]

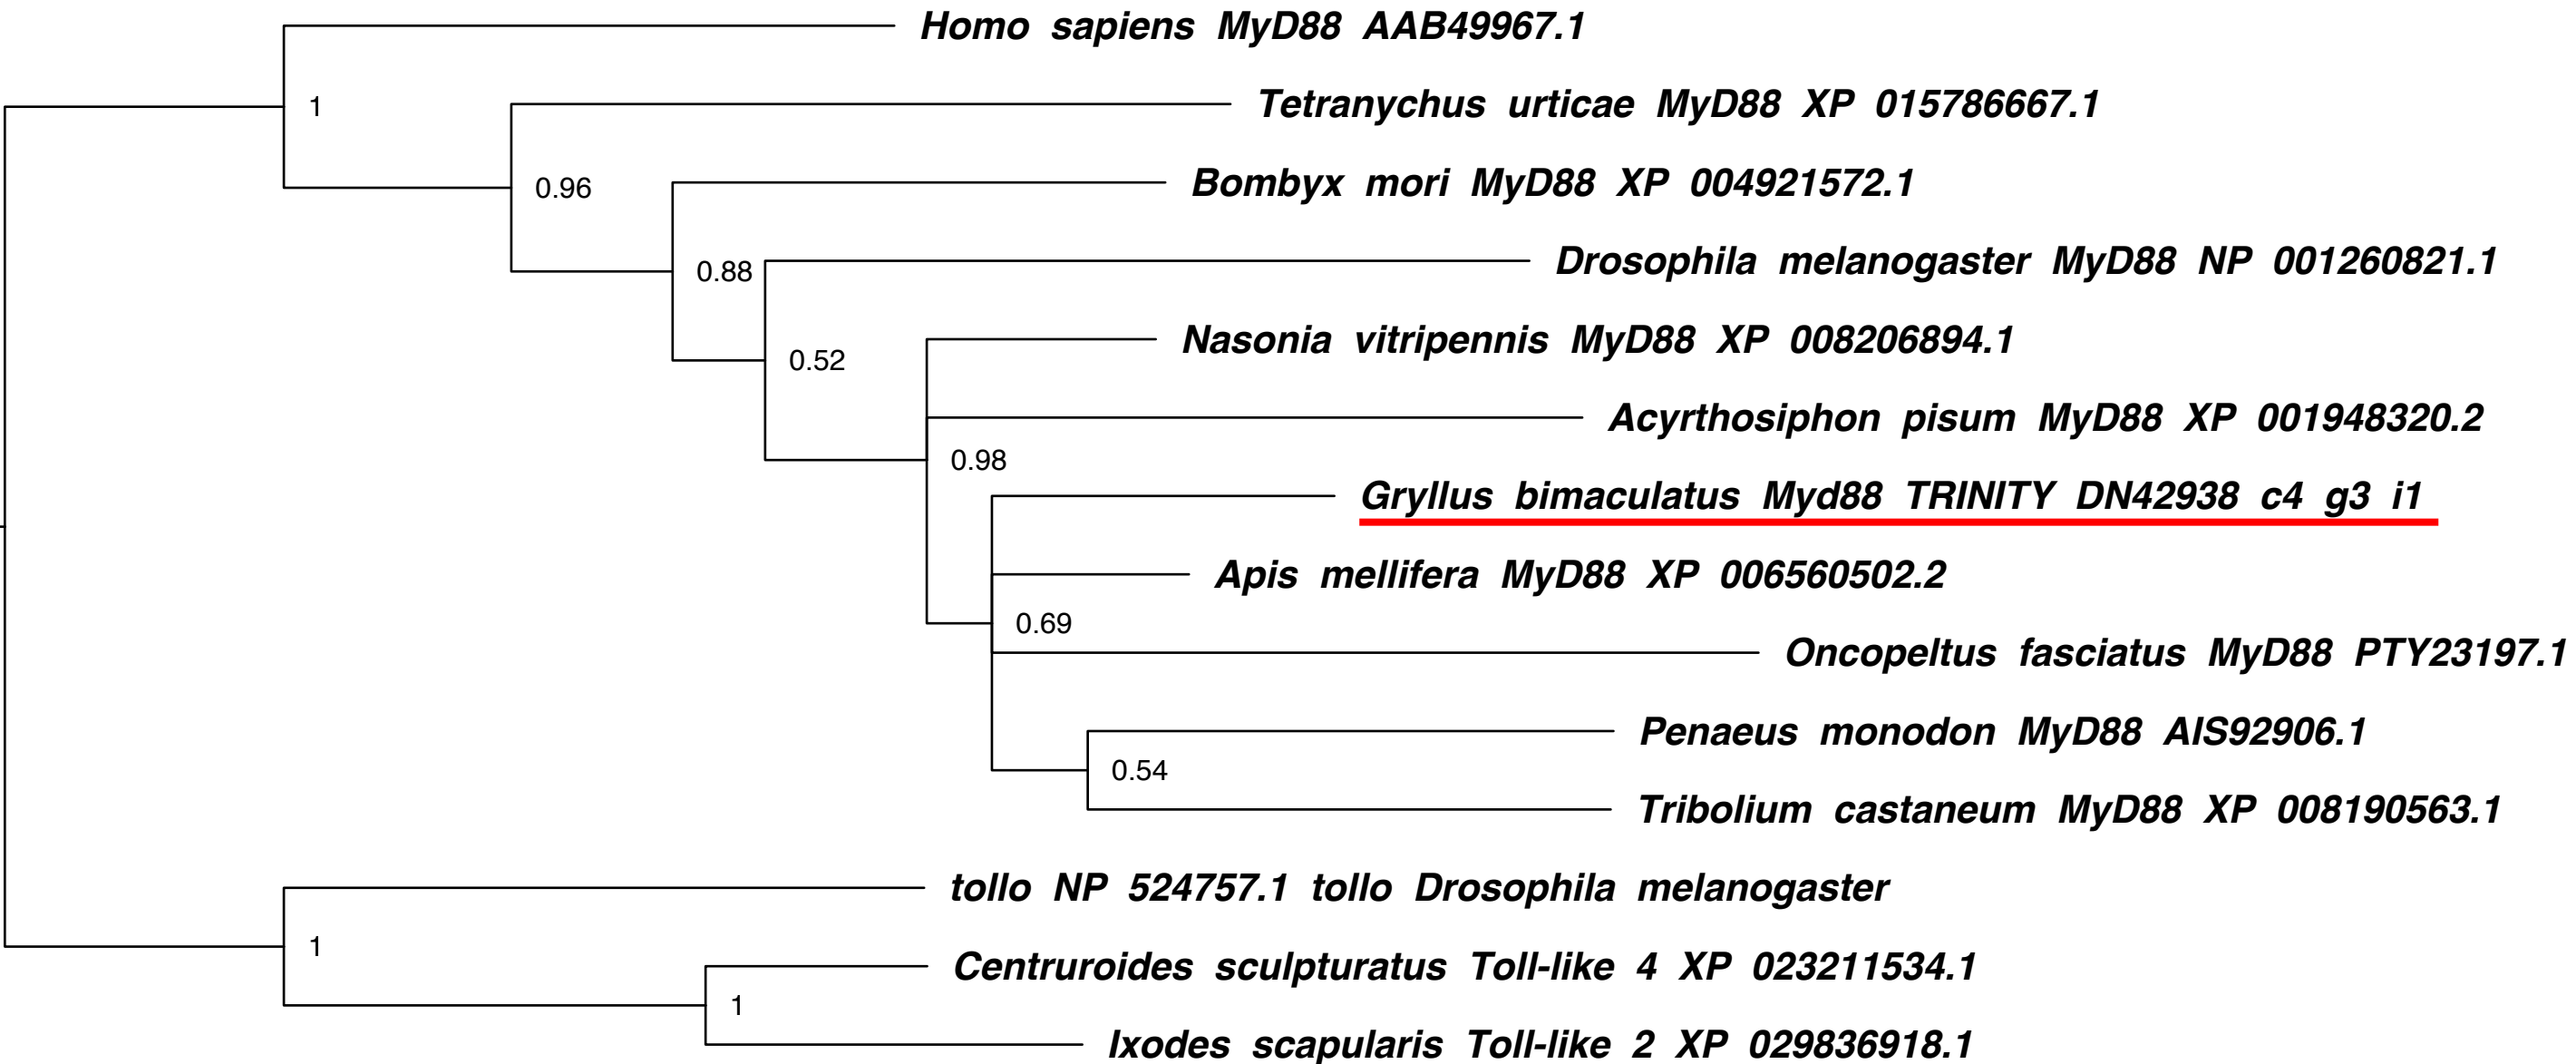

0.2

Supplement: supp3 [file elife-68287-supp3-v2.zip]

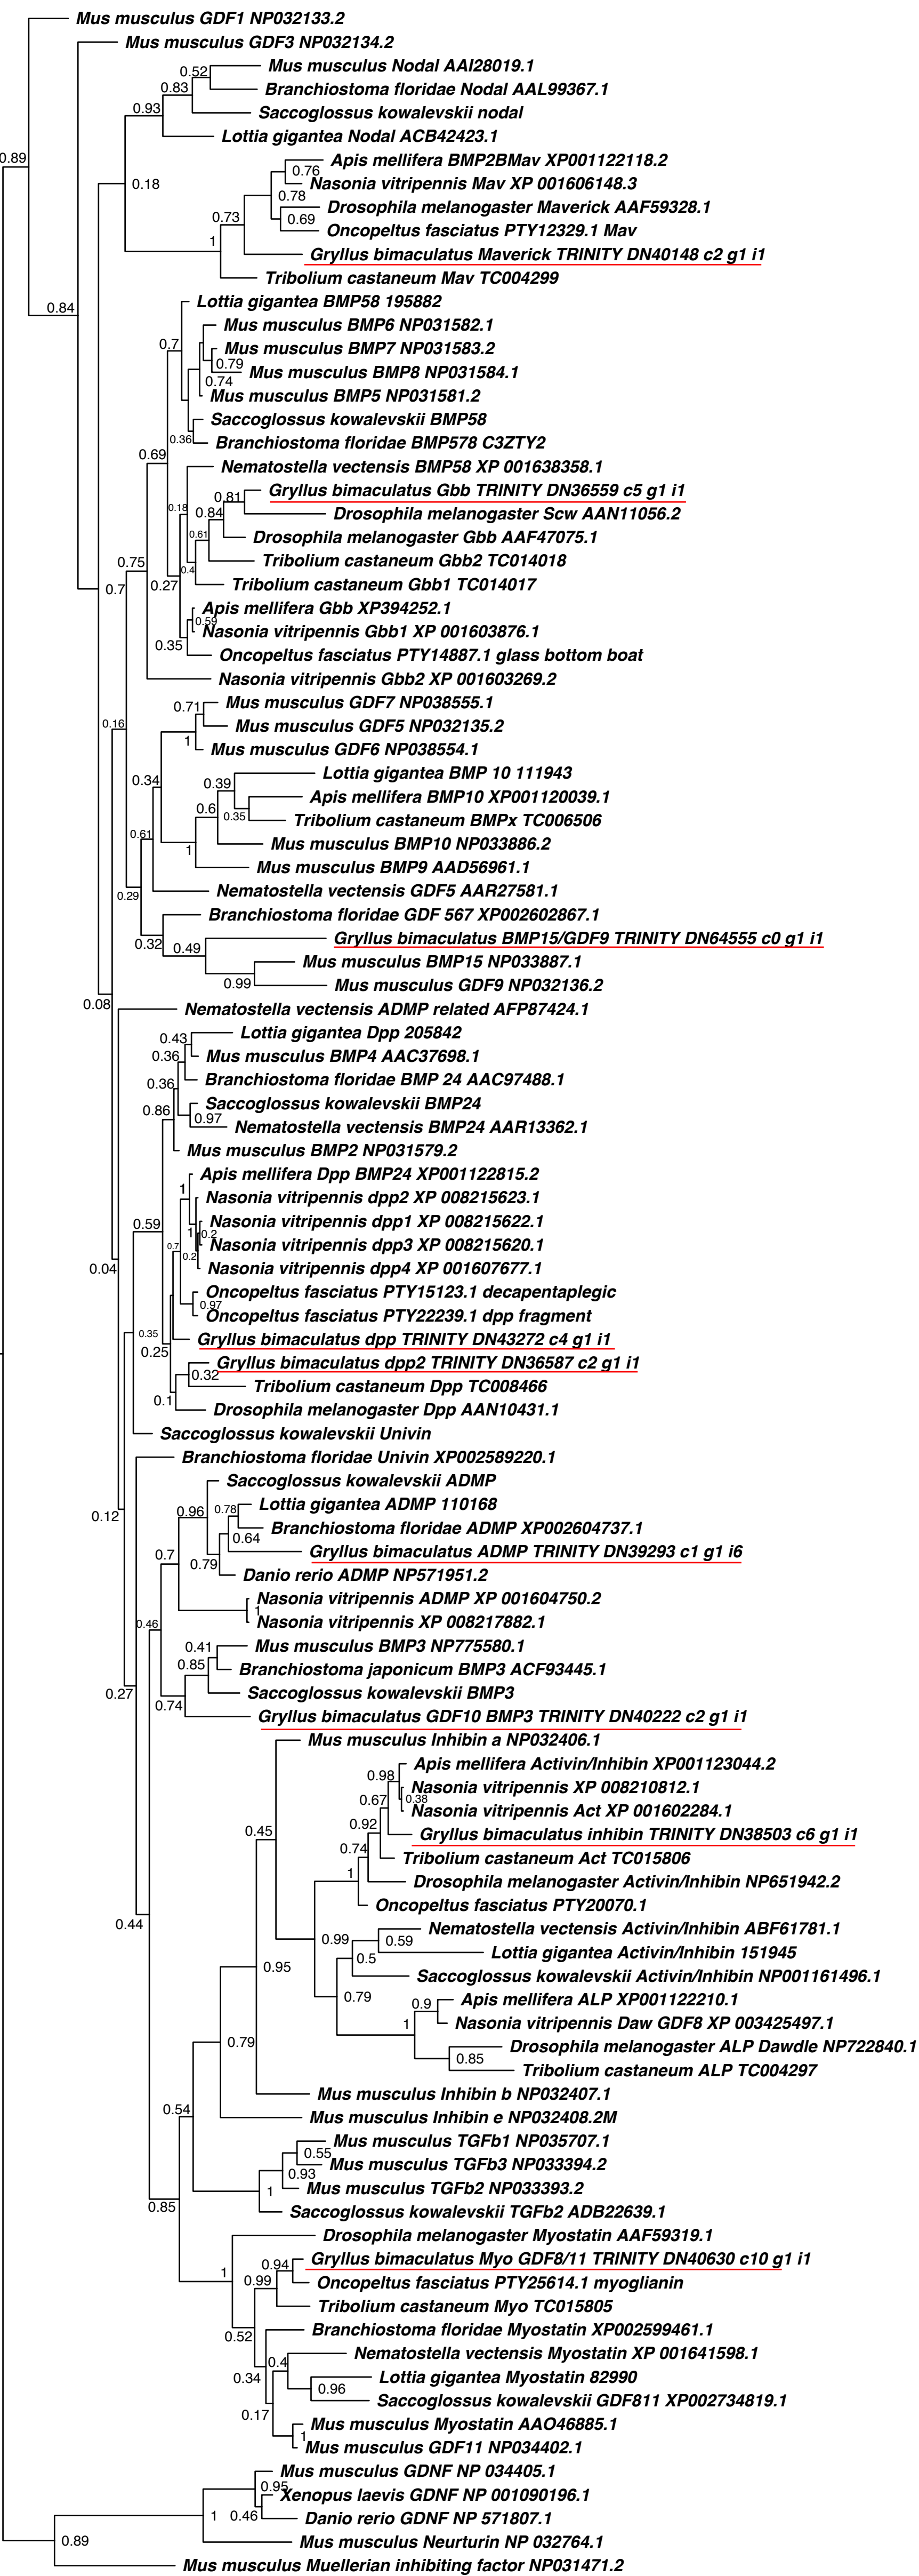

0.4

Supplement: supp3 [file elife-68287-supp3-v2.zip]

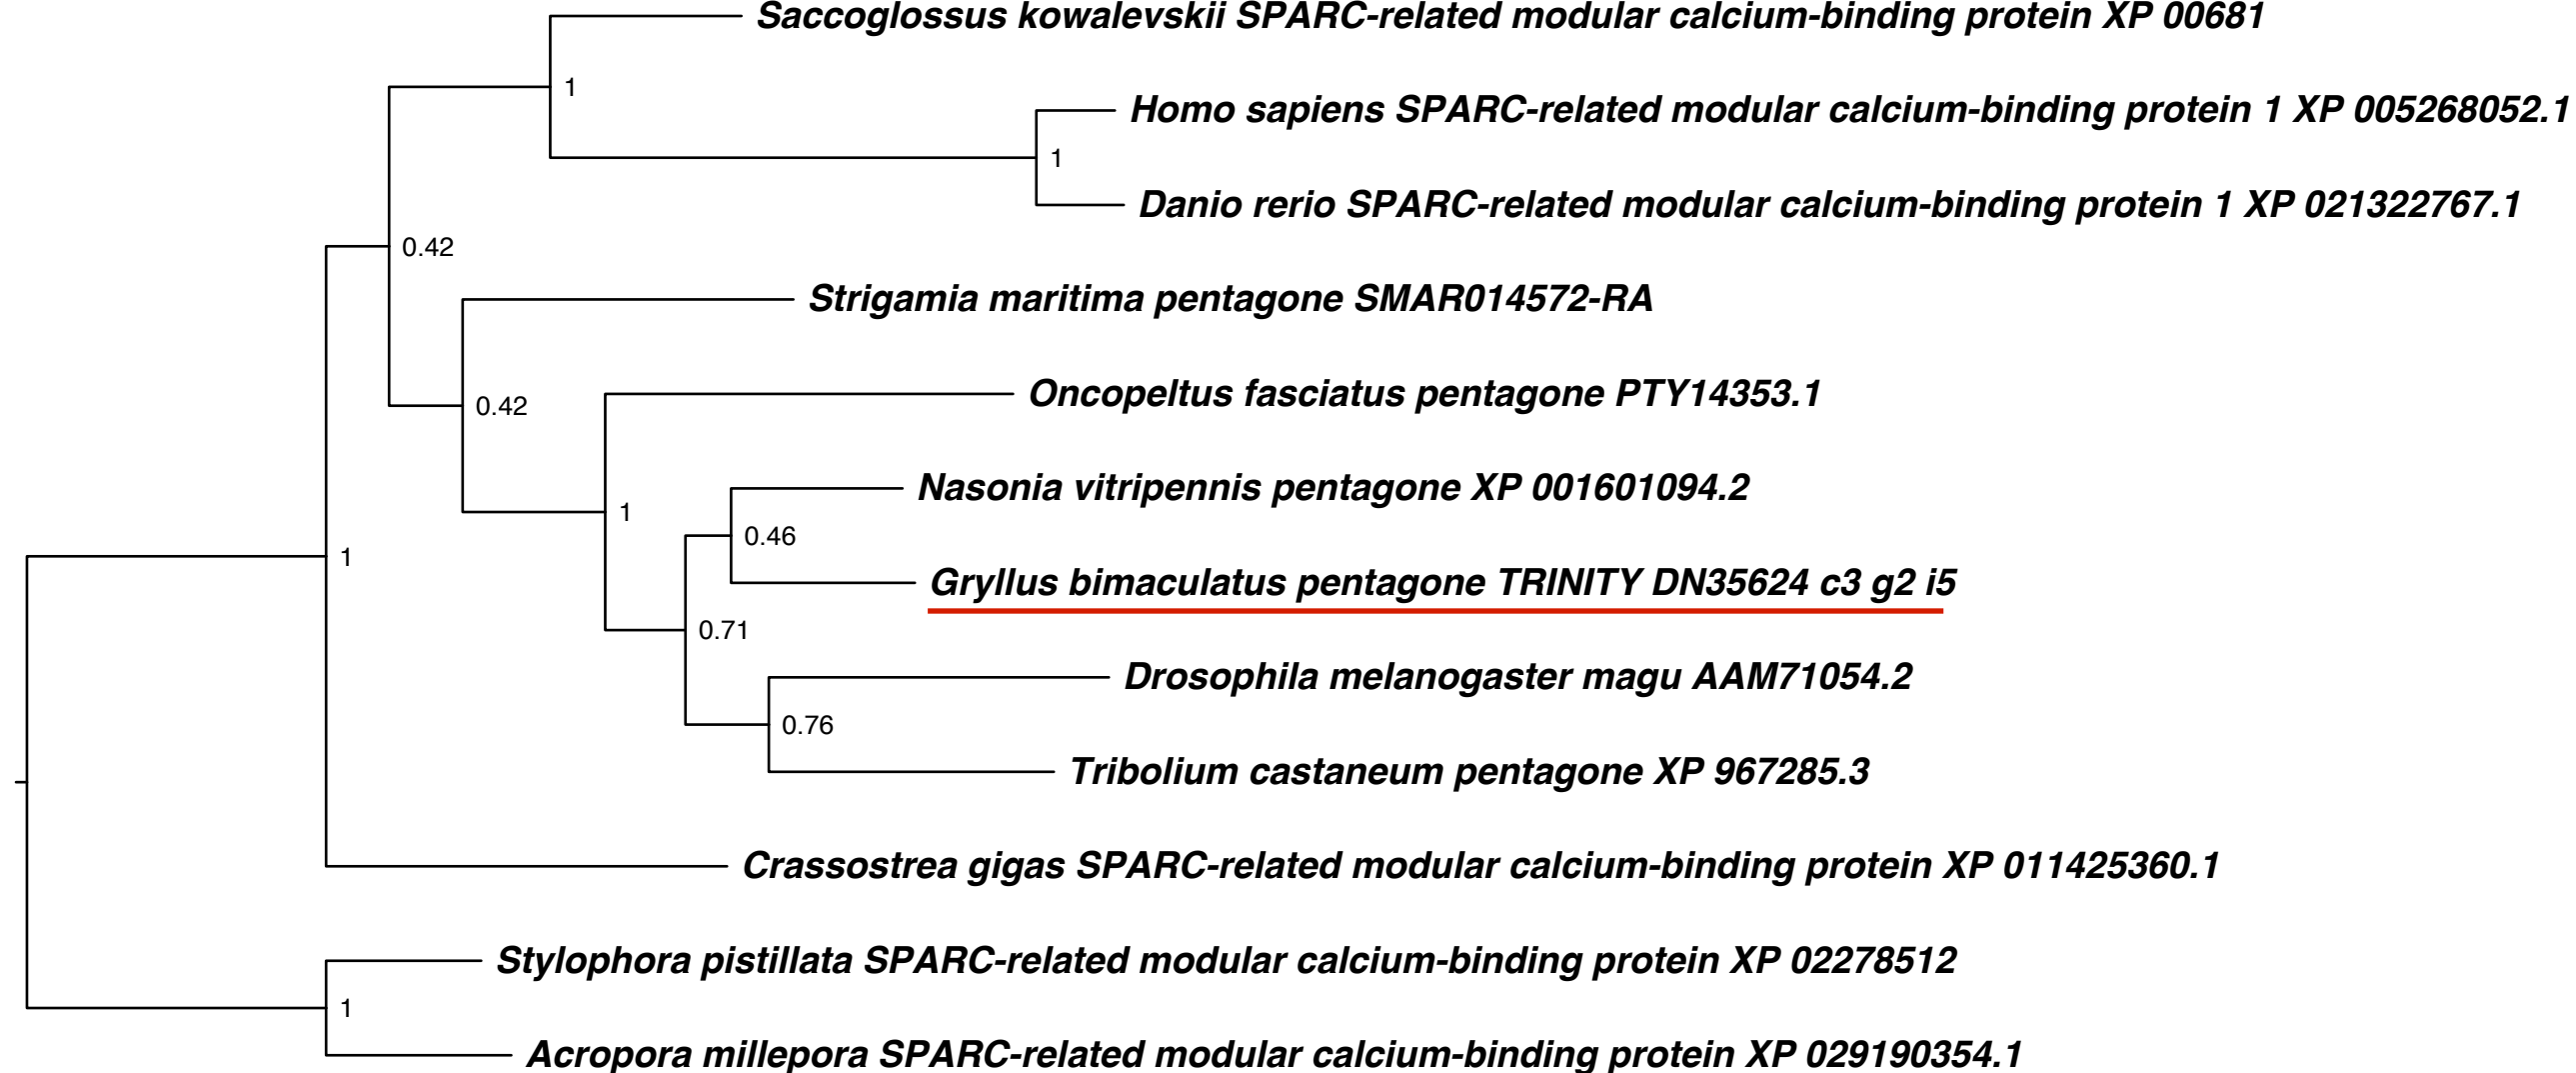

0.2

Supplement: supp3 [file elife-68287-supp3-v2.zip]

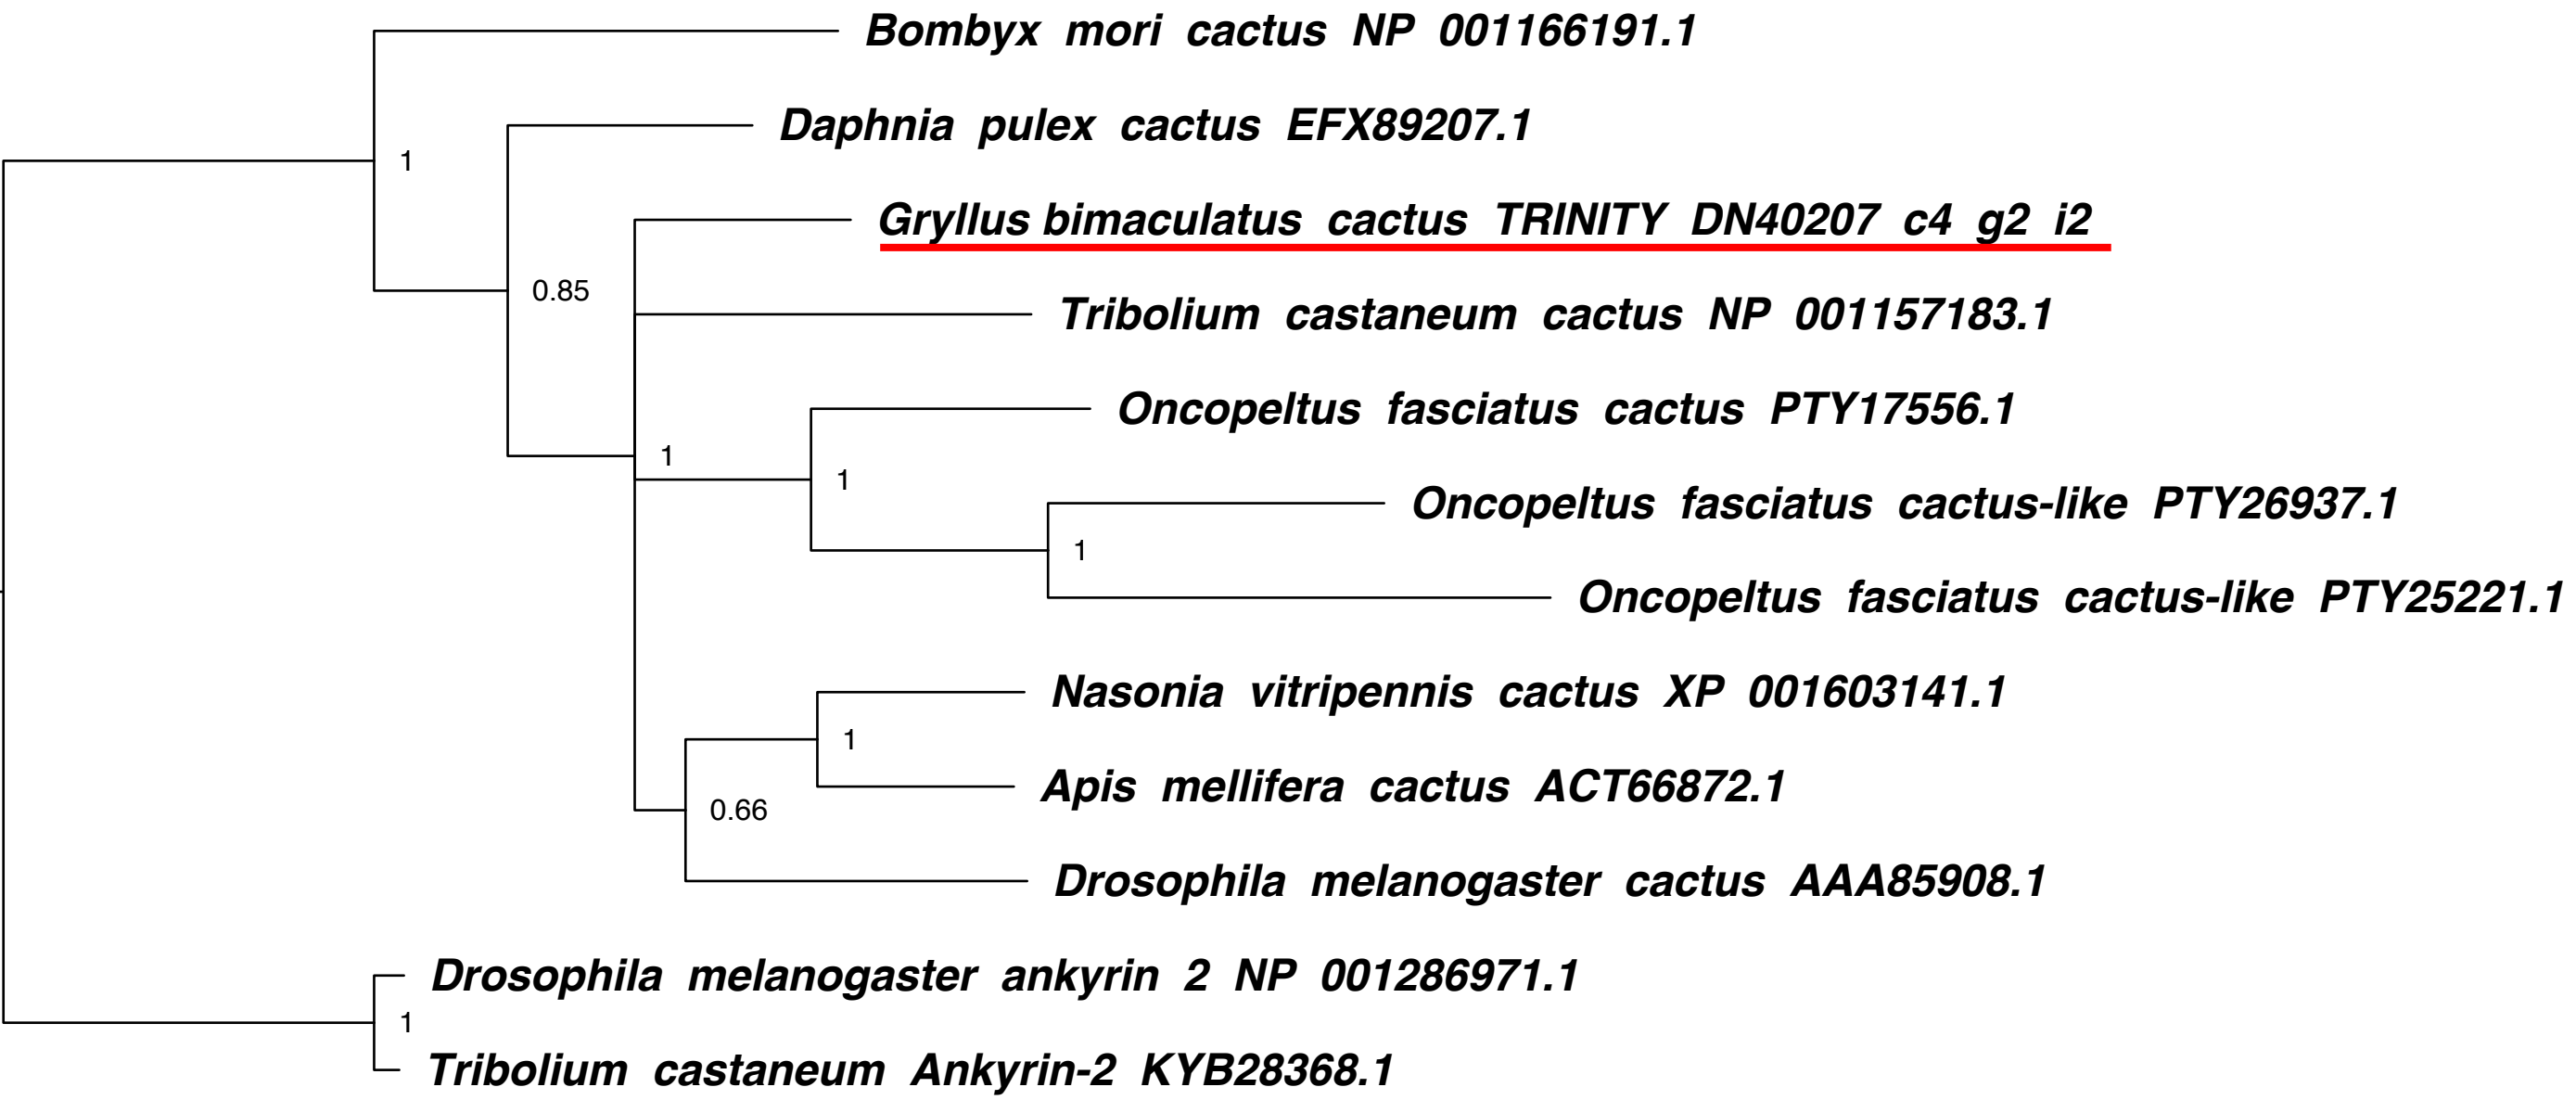

0.2

Supplement: supp3 [file elife-68287-supp3-v2.zip]

*Tribolium castaneum* MadX TC008788

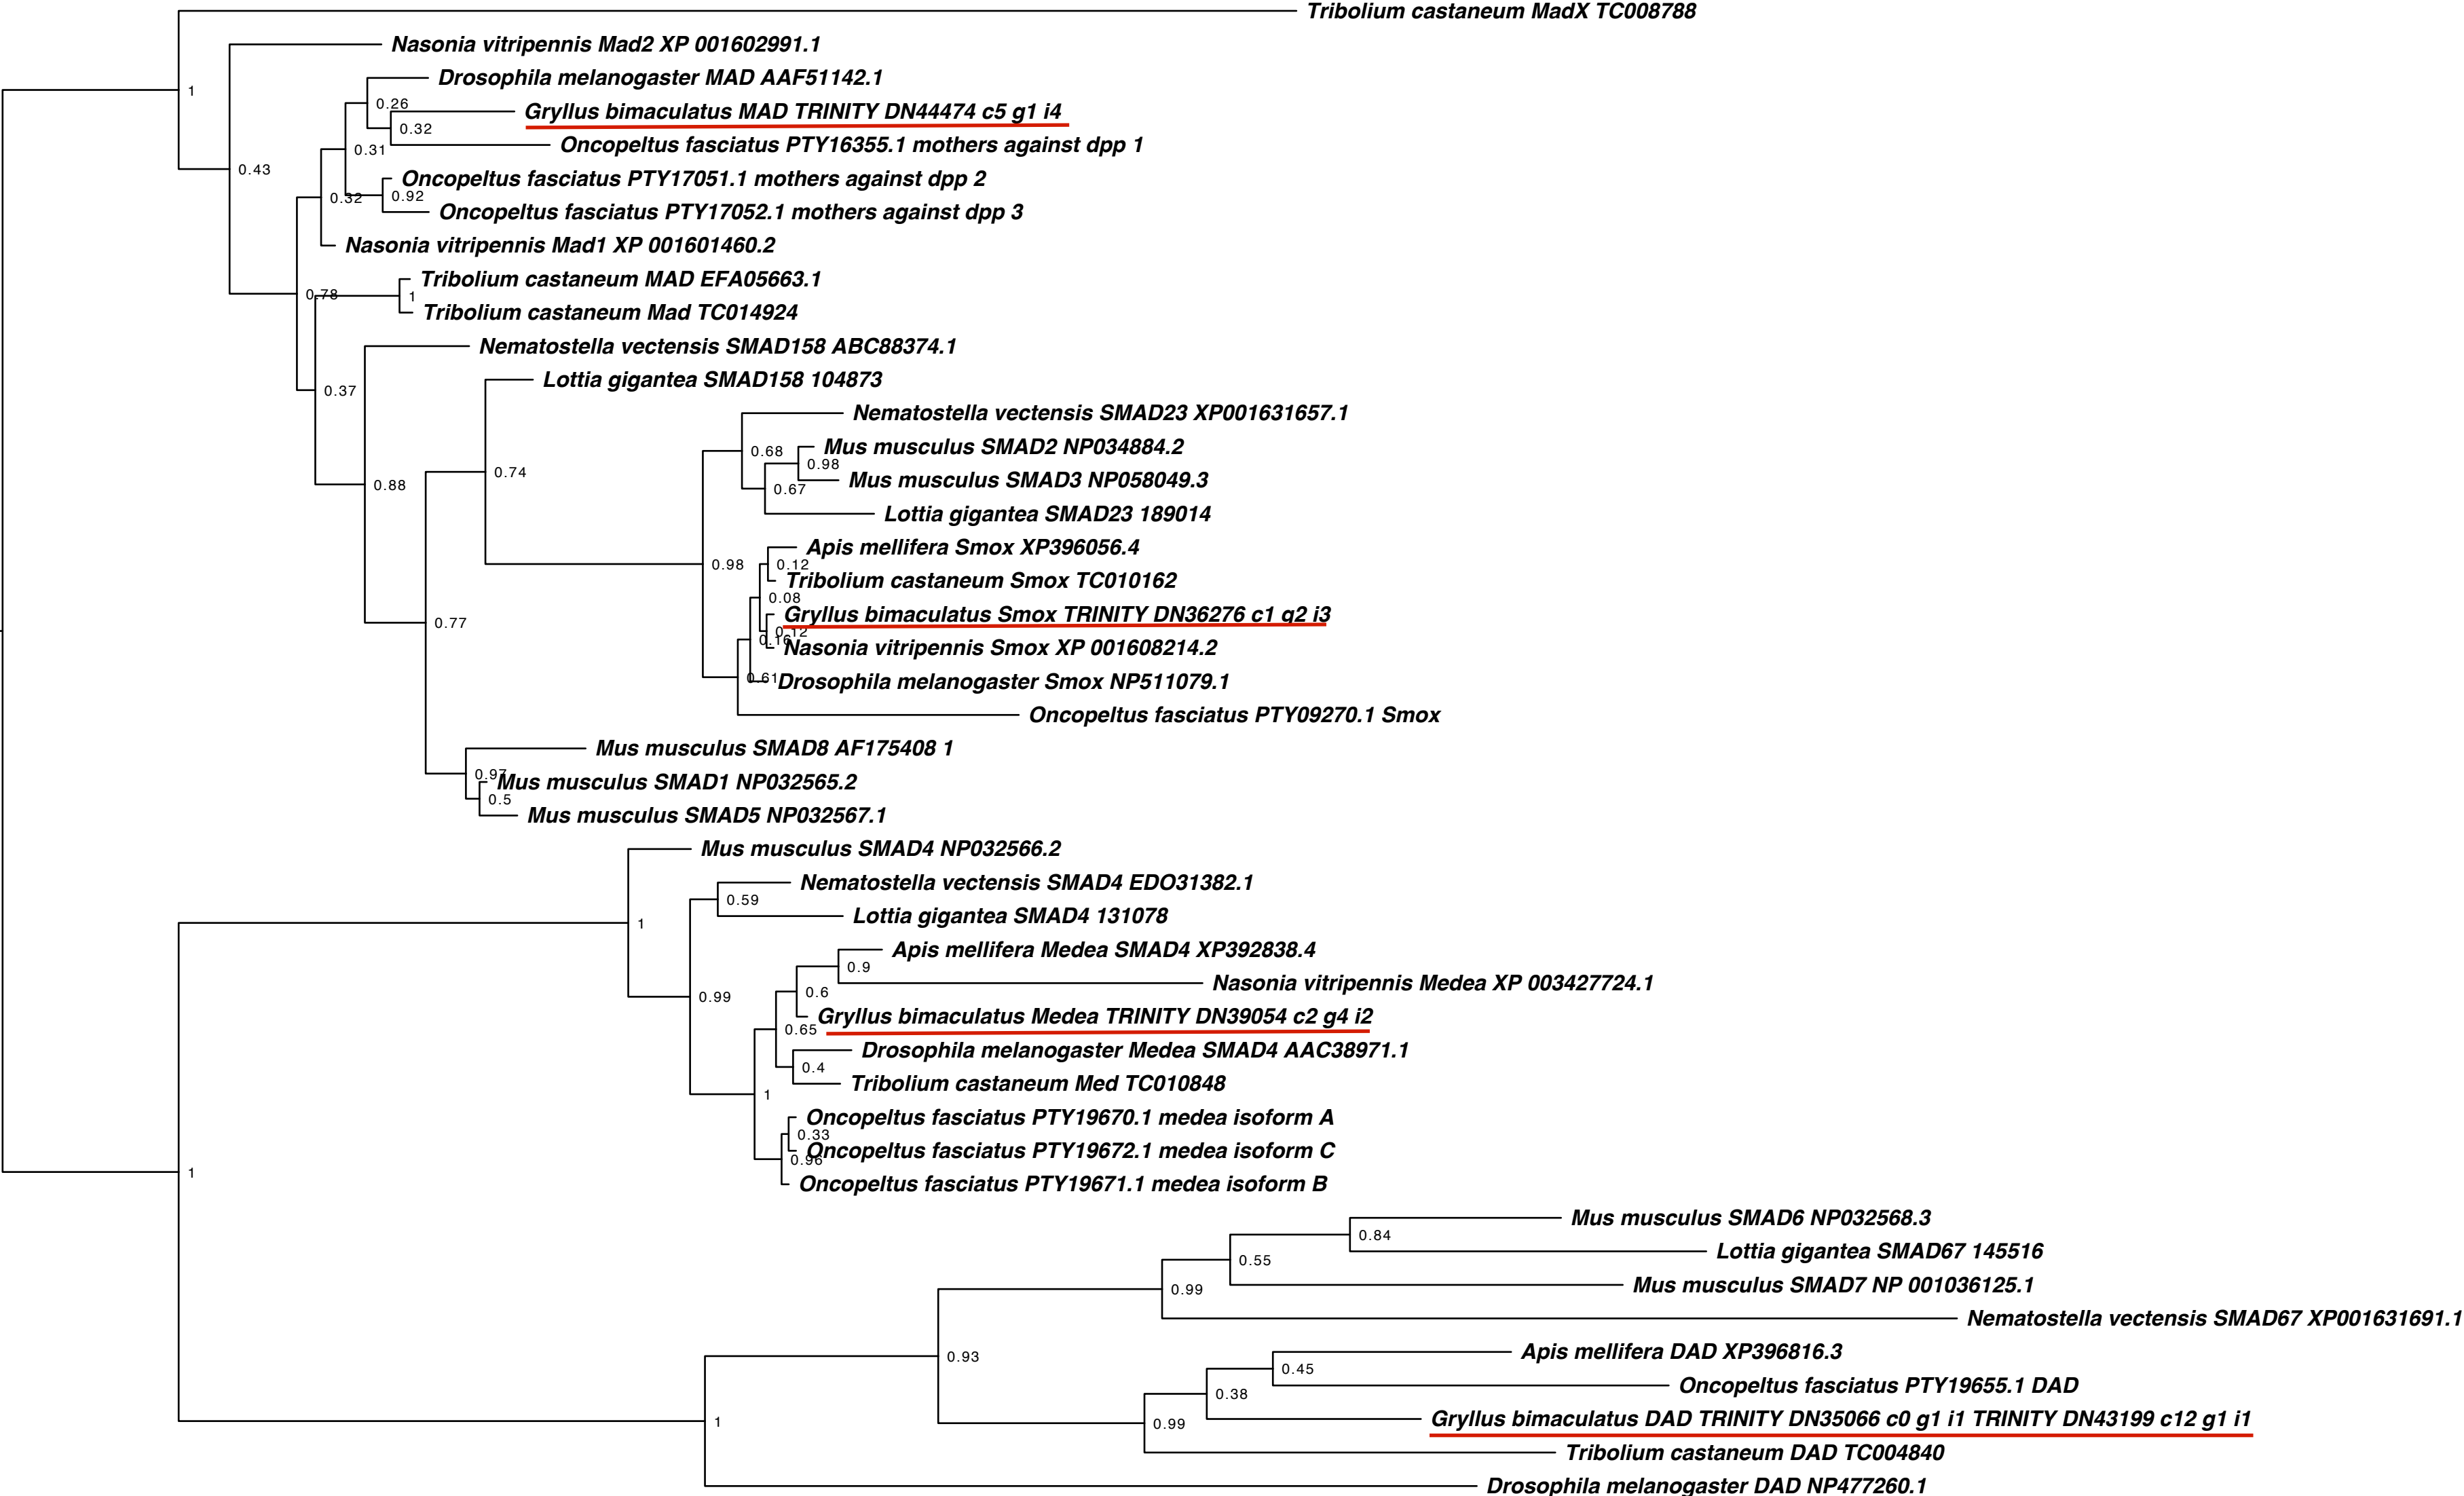

0.2

Supplement: supp3 [file elife-68287-supp3-v2.zip]

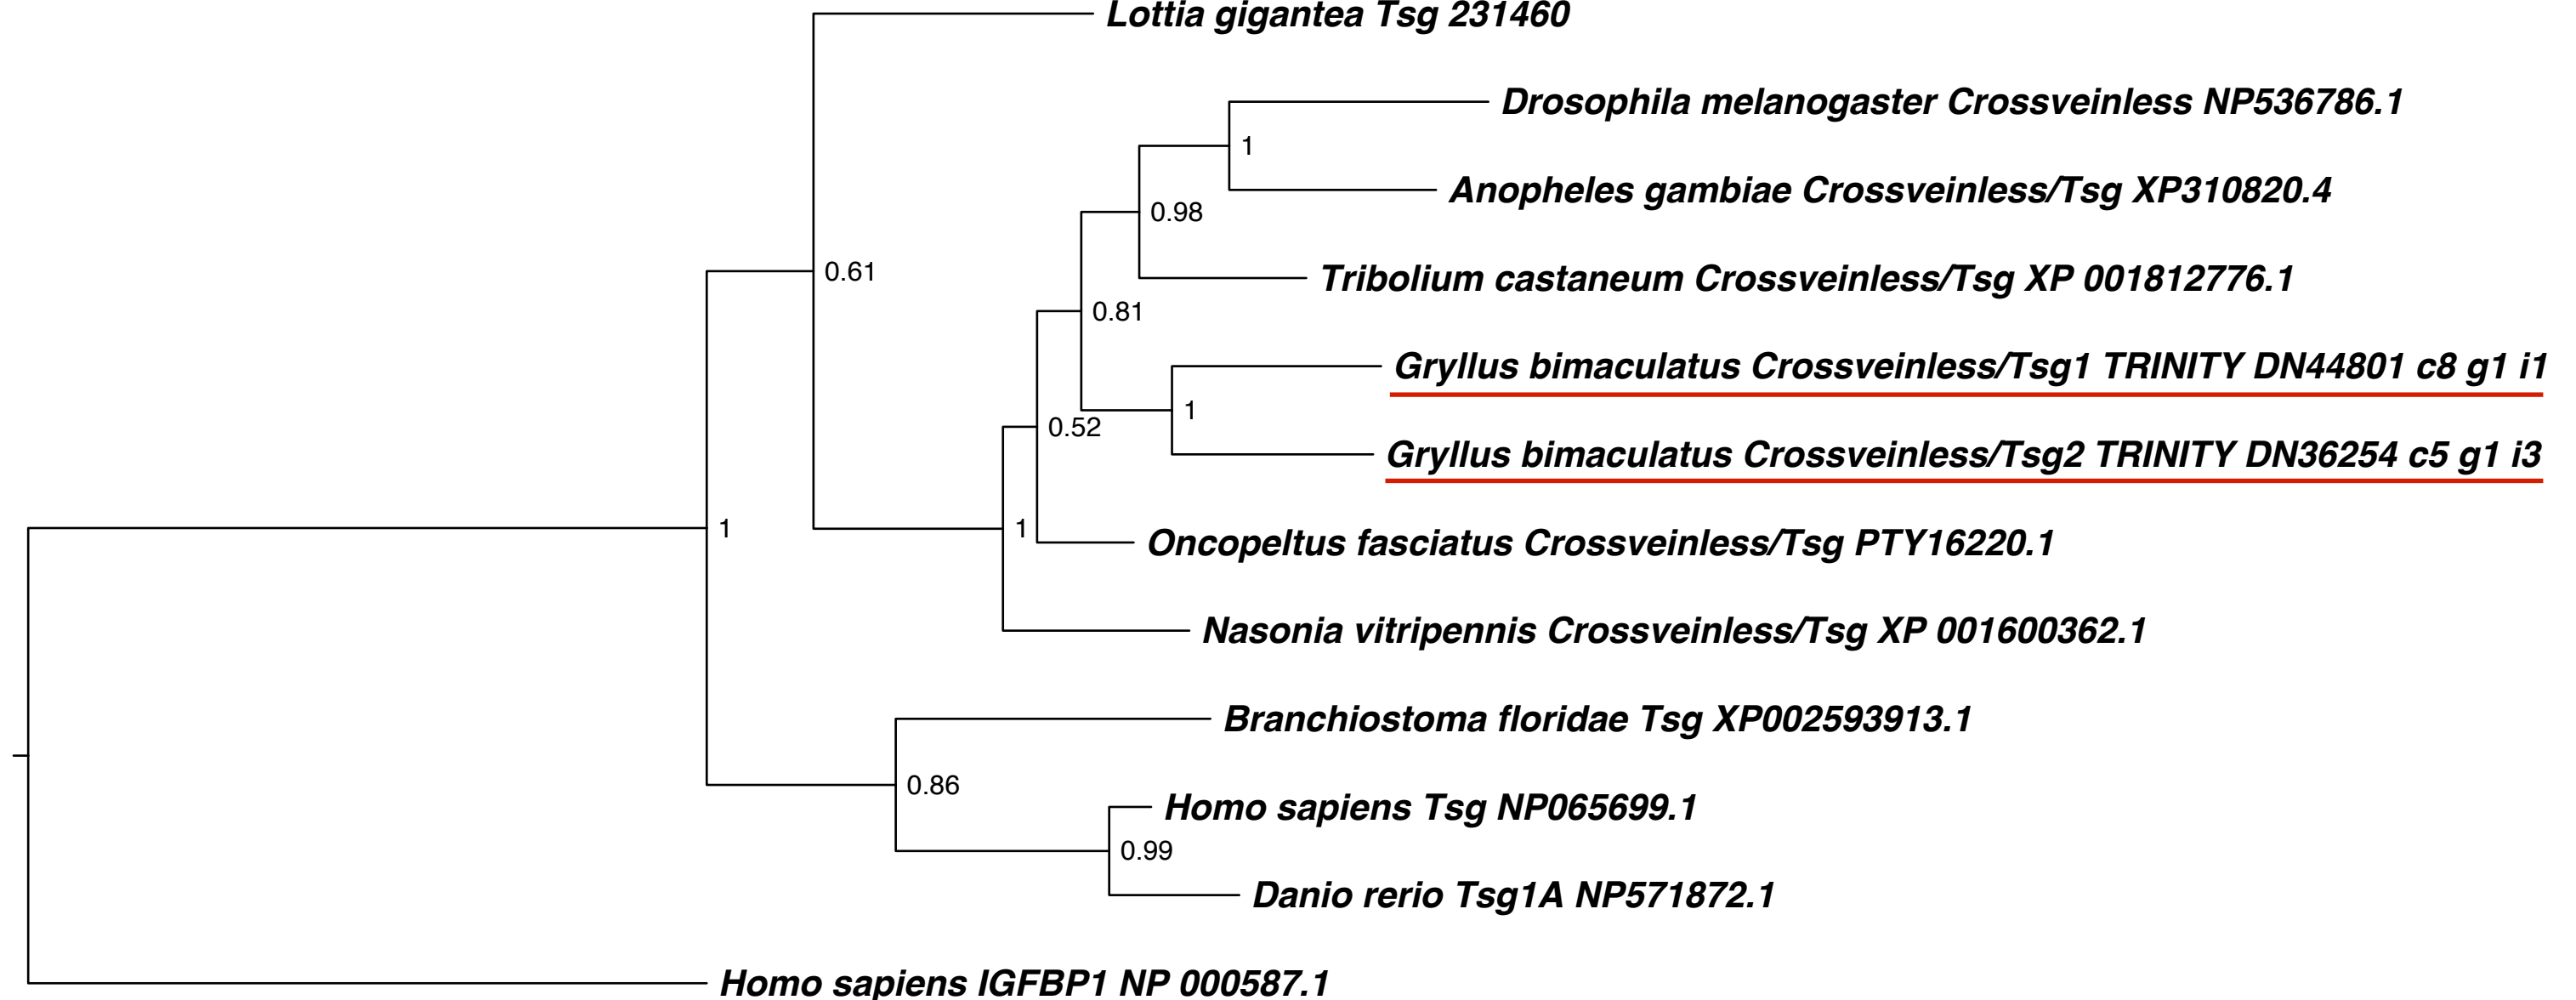

0.3

Supplement: supp3 [file elife-68287-supp3-v2.zip]

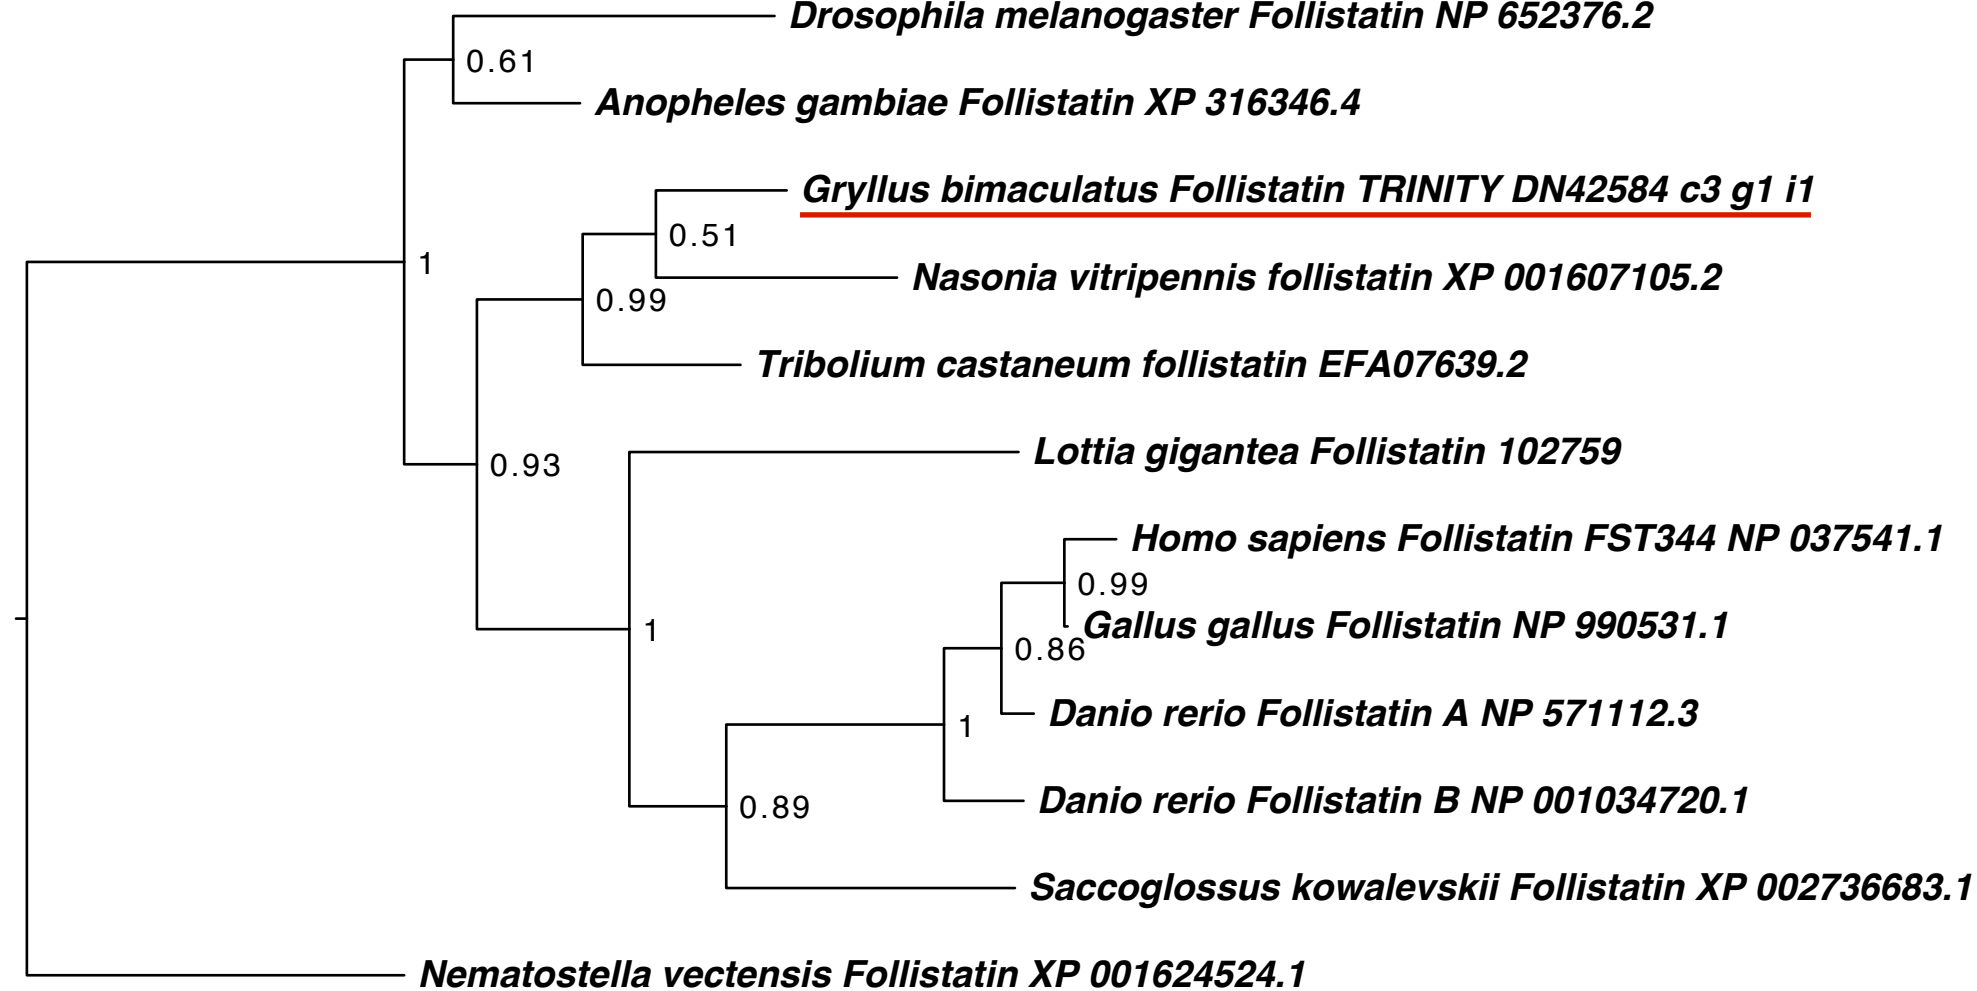

0.2

Supplement: supp3 [file elife-68287-supp3-v2.zip]

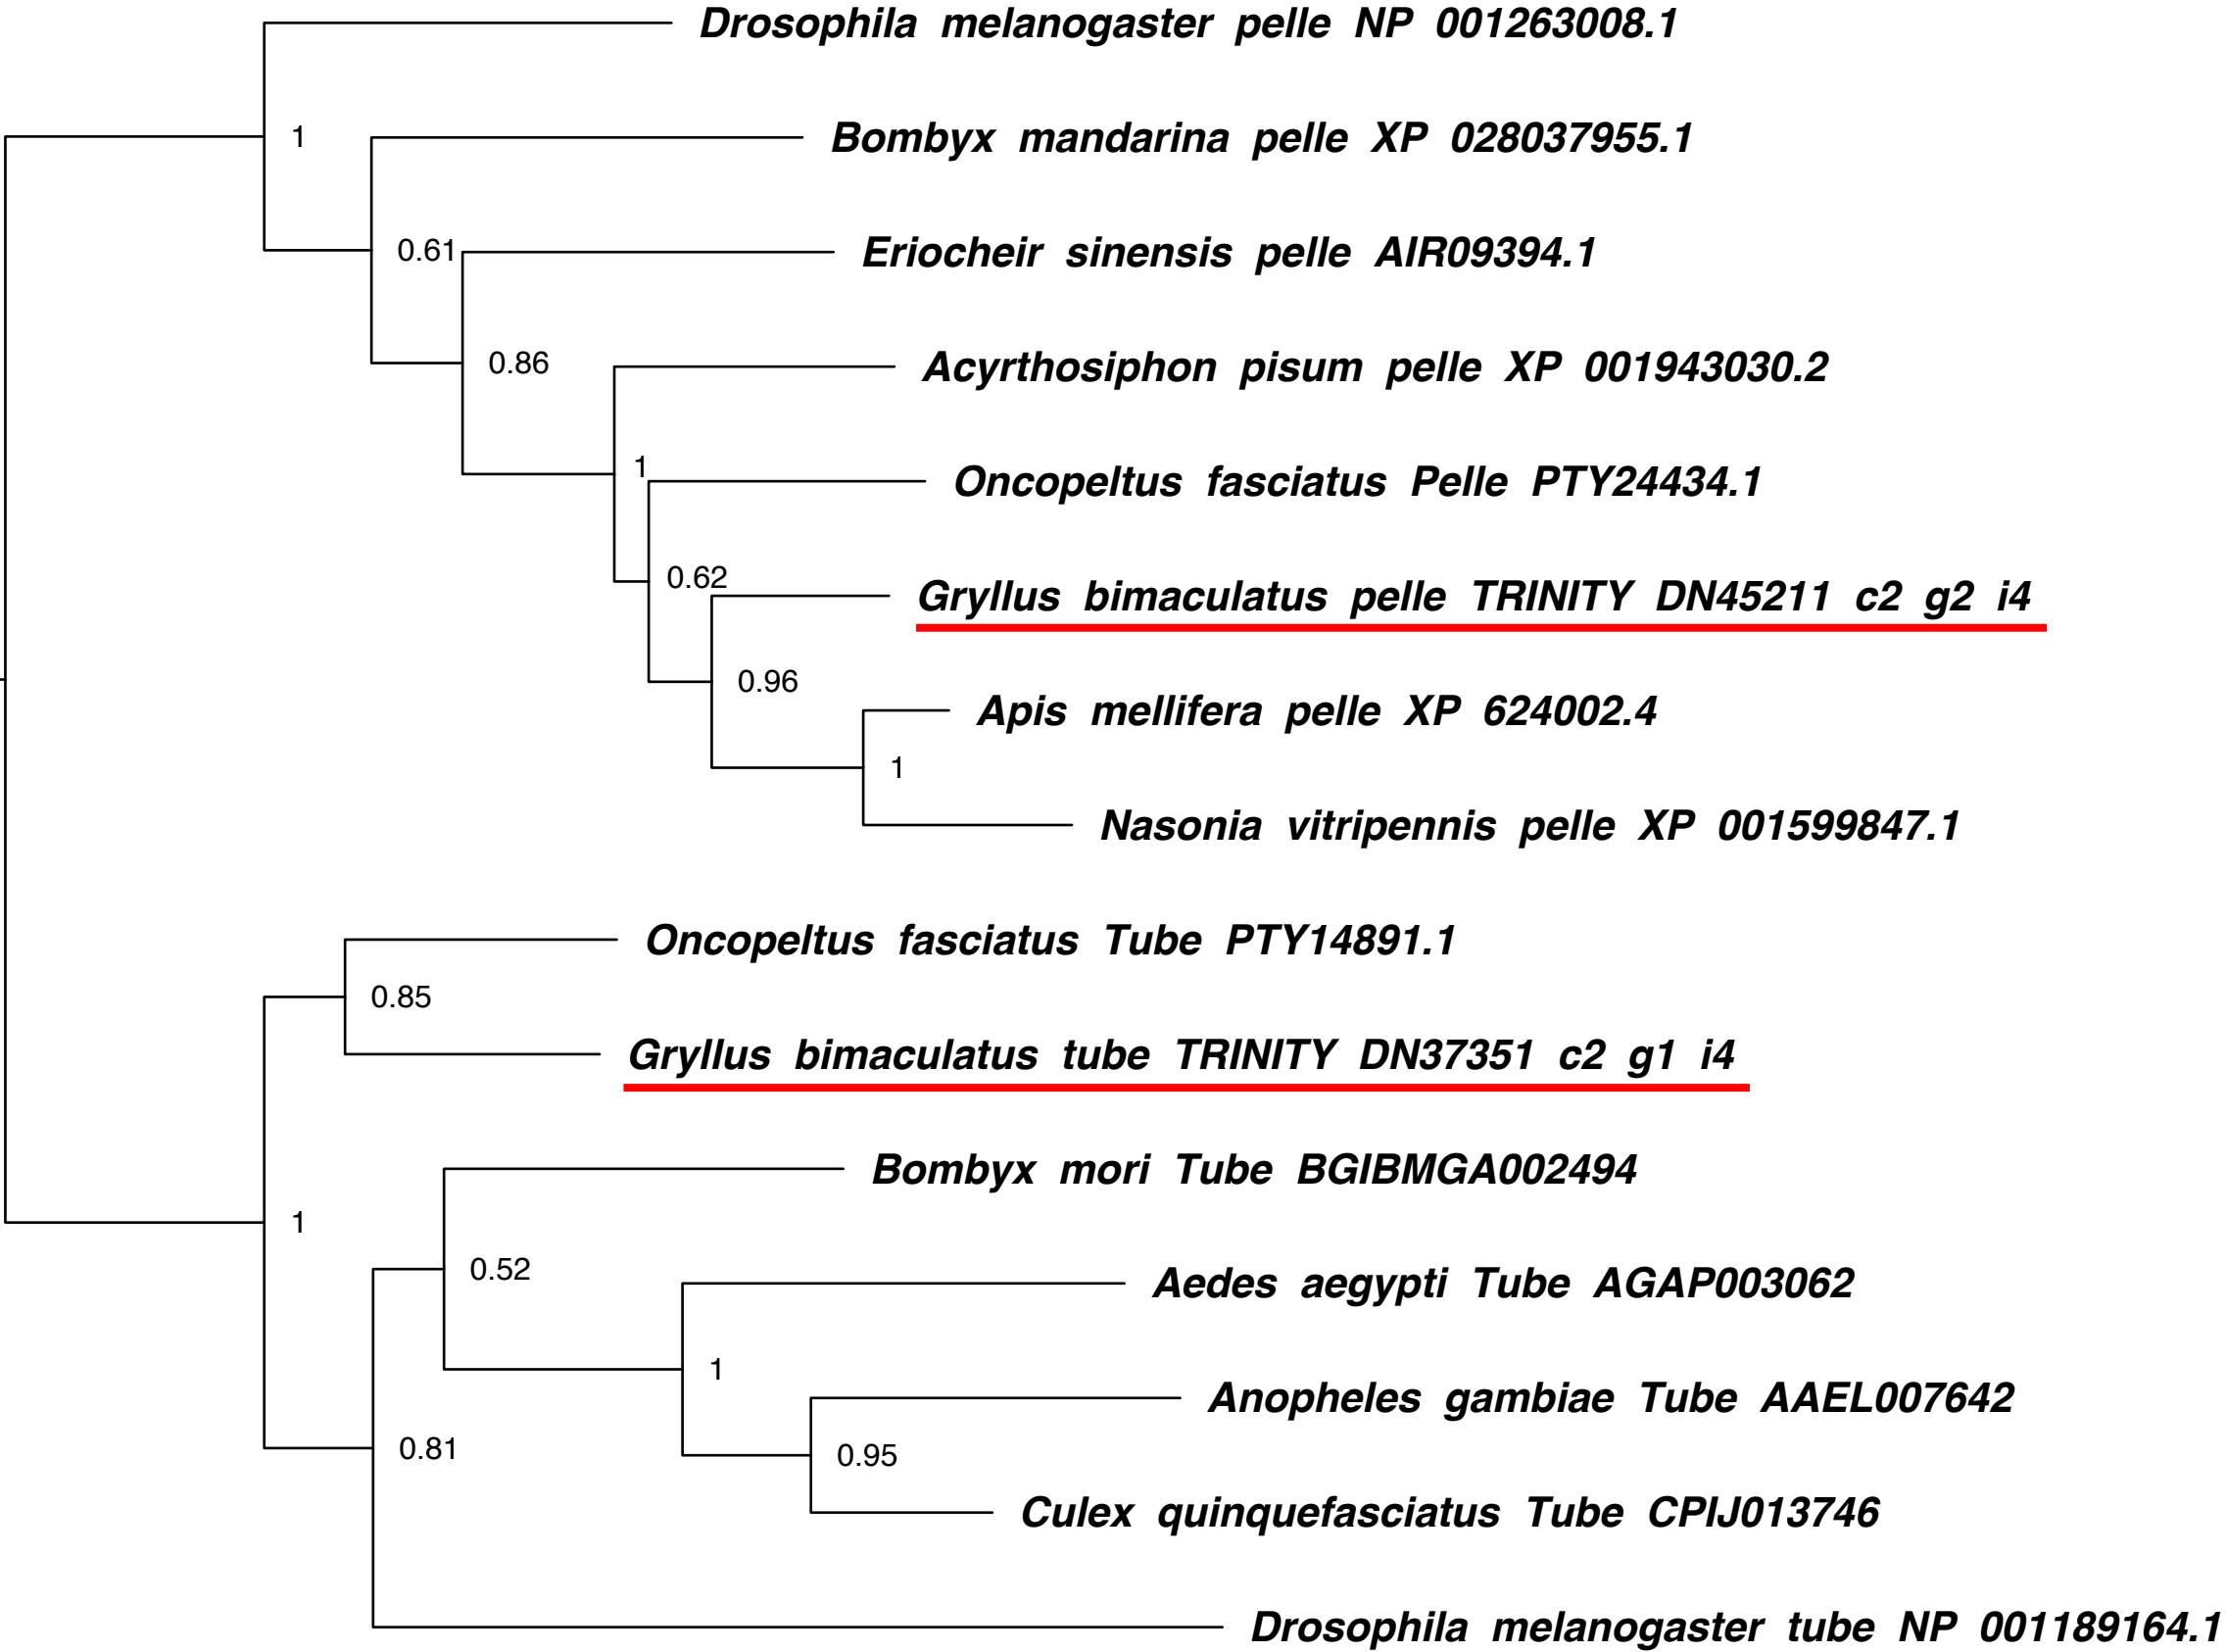

0.3

Supplement: supp3 [file elife-68287-supp3-v2.zip]
